# Supplementary material
Source: MDPI journal article supplement (https://www.mdpi.com/2073-445X/10/5/460)
Supplement: s1 [file s1 › land-1188554-supplementary.pdf]

# The Scenic Beauty of Geosites and Its Relation to Their Scientific Value and Geoscience Knowledge of Tourists: A Case Study from Southeastern Spain

Getaneh Addis Tessema <sup>1,2,\*</sup>, Jean Poesen <sup>1,3</sup>, Gert Verstraeten <sup>1</sup>, Anton Van Rompaey <sup>1</sup> and Jan van der Borg <sup>1</sup>

<sup>1</sup> Division of Geography and Tourism, Department of Earth and Environmental Studies, KU Leuven, Celestijnenlaan 200E, 3001 Leuven, Belgium; jean.poesen@kuleuven.be (J.P.); gert.verstraeten@kuleuven.be (G.V.); anton.vanrompaey@kuleuven.be (A.V.R.); jan.vanderborg@kuleuven.be (J.v.d.B.)

<sup>2</sup> Department of Tourism and Hotel Management, Bahir Dar University, Bahir Dar P.O. Box 79, Ethiopia

<sup>3</sup> Faculty of Earth Sciences and Spatial Management, Maria Curie-Skłodowska University, Kraśnicka 2cd, 20-718 Lublin, Poland

\* Correspondence: getanehaddis.tessema@kuleuven.be or gechzadd23@gmail.com

## Supplementary Materials

**Questionnaire S1.** Questionnaire for rating the scenic beauty of the 34 geosites by the NGB-NV and GB-NV groups<sup>1</sup>, based on representative photographs of the geosites.

The objective of this questionnaire is to rate the scenic beauty of geosites. Geosites are understood here as geomorphological or geological features with associated cultural and/or ecological value, and are hence worth conservation.

The questionnaire consists of photos of 34 geosites from southeastern Spain. Each geosite is represented with two to three photos to provide you typical views of the geosite. The first photo of each geosite shows an overview of the surrounding landscape, and the second (and third, if any) photo/s usually shows the geosite in more detail. You rate each geosite after looking at the two/three photos. Hence, for each geosite, you will find the scenic beauty rating scale at the bottom of the second or third photo. Please rate the scenic beauty of these geosites using a five-point Likert scale where 1 = not at all interesting, 2 = slightly interesting, 3 = moderately interesting, 4 = very interesting, and 5 = extremely interesting. In addition, please also mention the features/elements of the geosite that are very interesting to you, if any.

If you have any question, please contact the researcher via email.

Thank you very much in advance for participating in this survey!

---

<sup>1</sup> The respondents in this study were grouped into three, following their geoscience background and field visits as follows: NGB-NV = no geoscience background and no visit to geosites; GB-NV = geoscience background and no visit to geosites; GB-V = geoscience background and visit to geosites.

Geosite 1. Boca Andarax: **a,b** © G. Tessema, May 2019; **c** © Google Earth Images, February 2021.

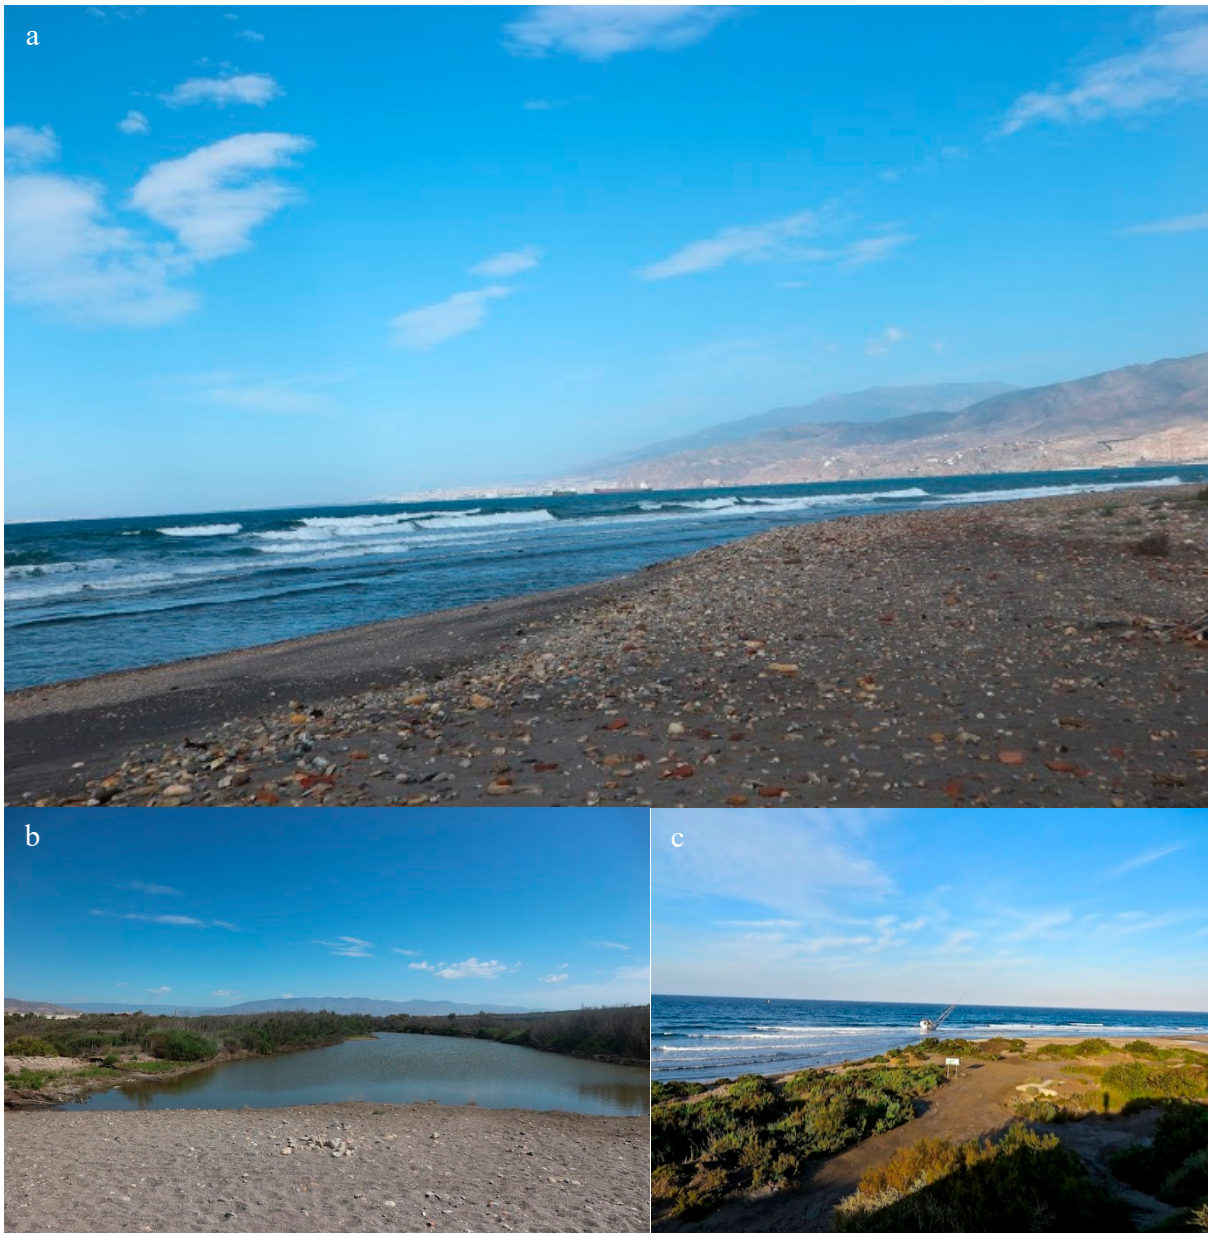

Not at all interesting      1      2      3      4      5      Extremely interesting

Please mention features of Boca Andarax that are very interesting to you in terms of scenic beauty (if any). \_\_\_\_\_

Geosite 2. Torre Garcia: **a** © Google Earth Images, February 2021; **b** © G. Tessema, May 2019.

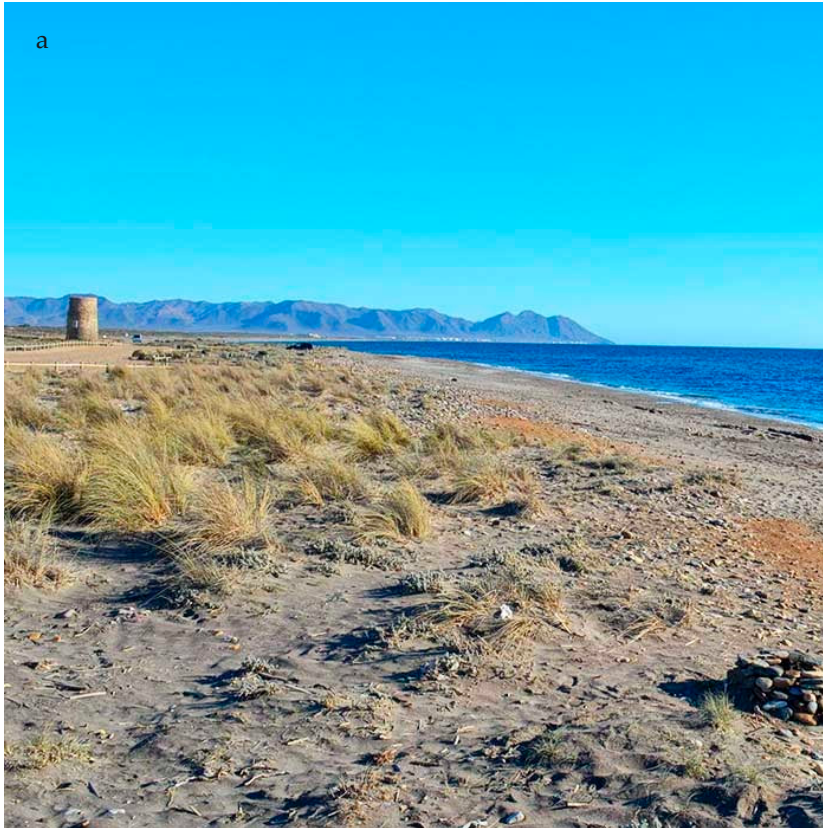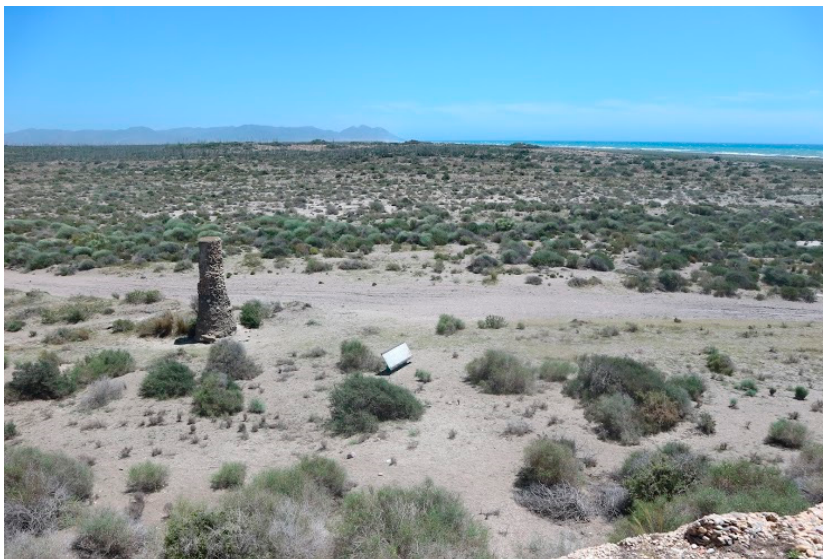

Not at all interesting      1      2      3      4      5      Extremely interesting

Please mention features of Torre Garcia that are very interesting to you in terms of scenic beauty (if any). \_\_\_\_\_

Geosite 3. Las Salinas: © G. Tessema, May 2019.

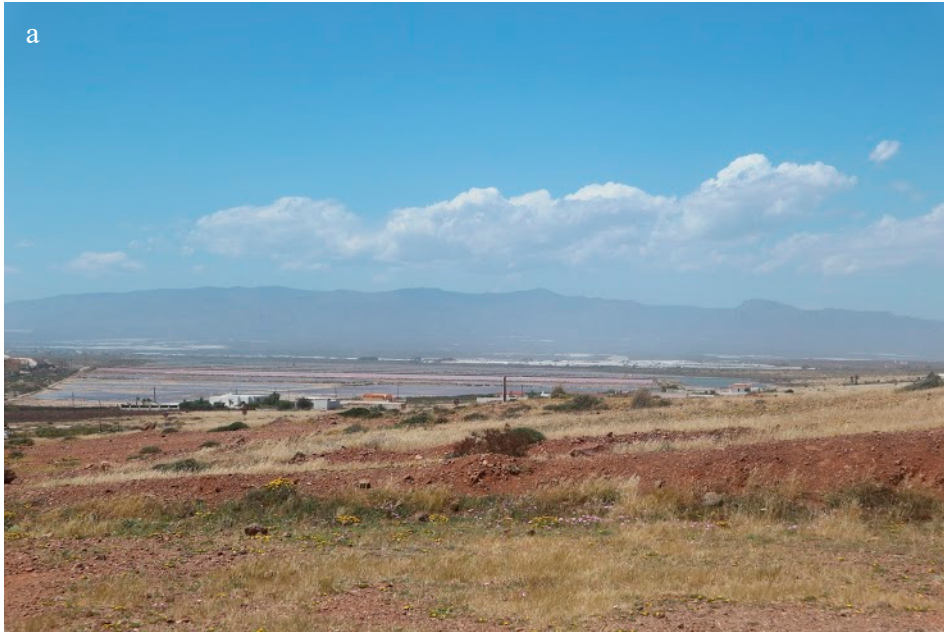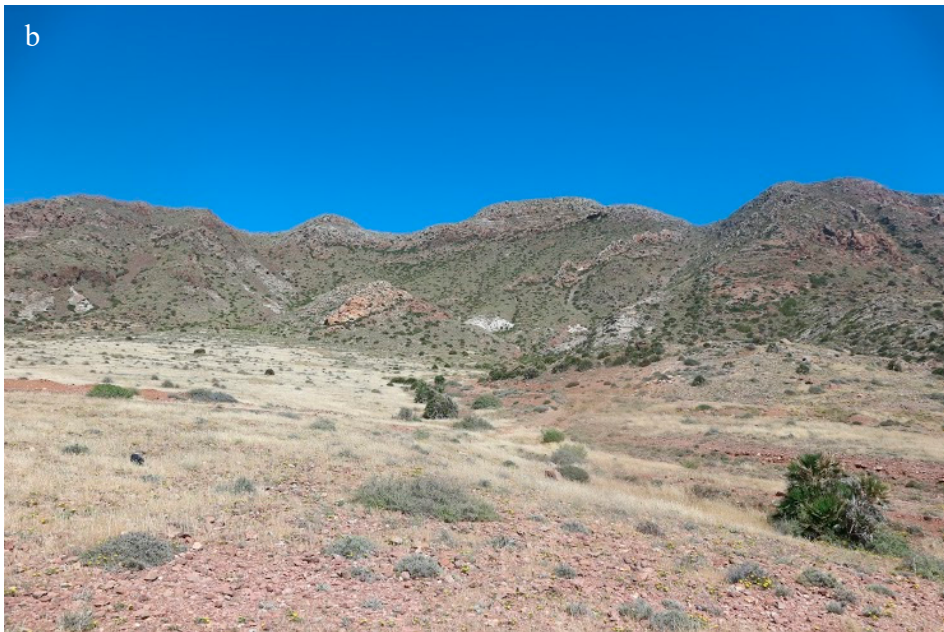

Not at all interesting    1    2    3    4    5    Extremely interesting

Please mention features of Las Salinas that are very interesting to you in terms of scenic beauty (if any).

---

Geosite 4. Punta Baja: © G. Tessema, May 2019.

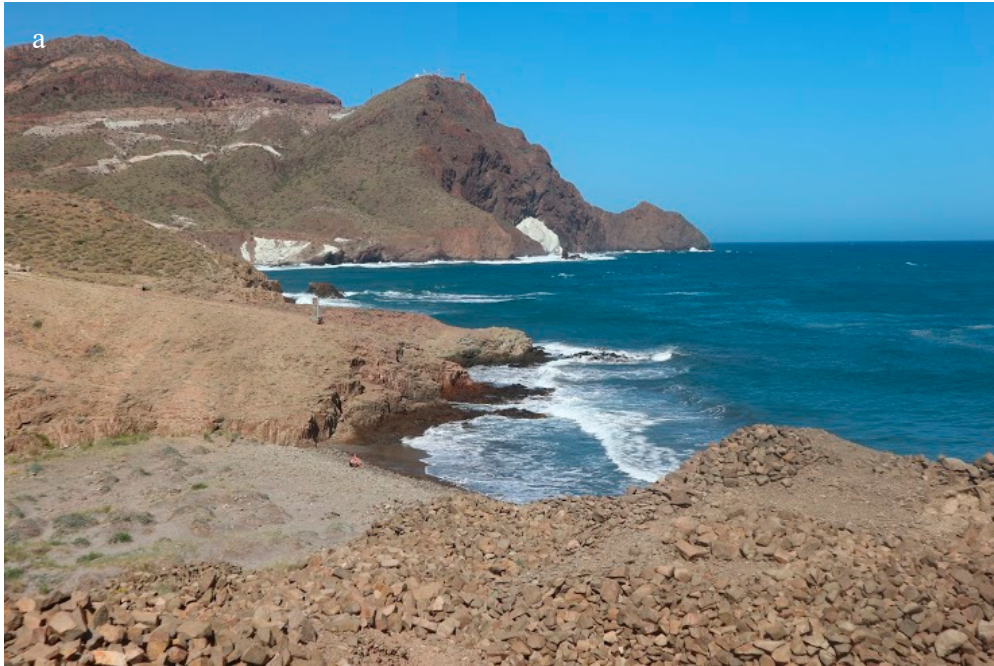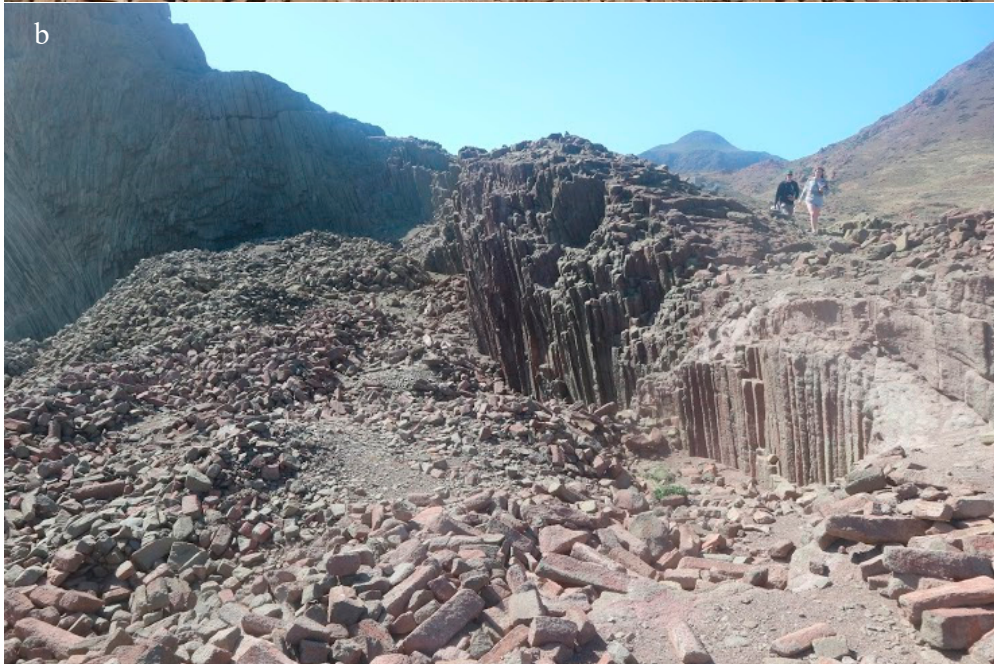

Not at all interesting      1      2      3      4      5      Extremely interesting

Please mention features of Punta Baja that are very interesting to you in terms of scenic beauty (if any).

---

Geosite 5. Cerro Pistolas: **a** © J. Poesen, May 2016; **b** © G. Tessema, May 2019.

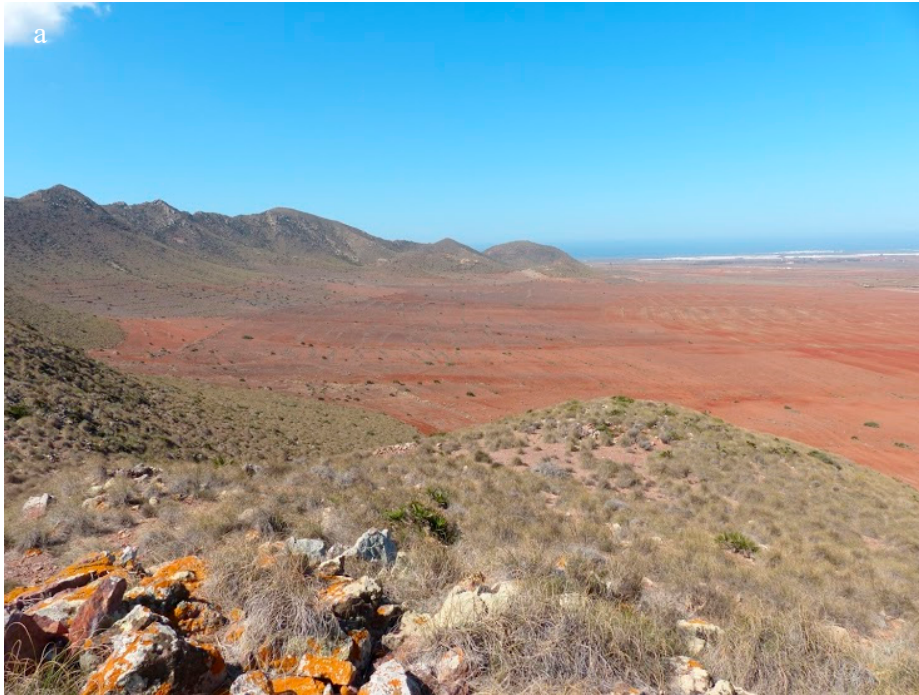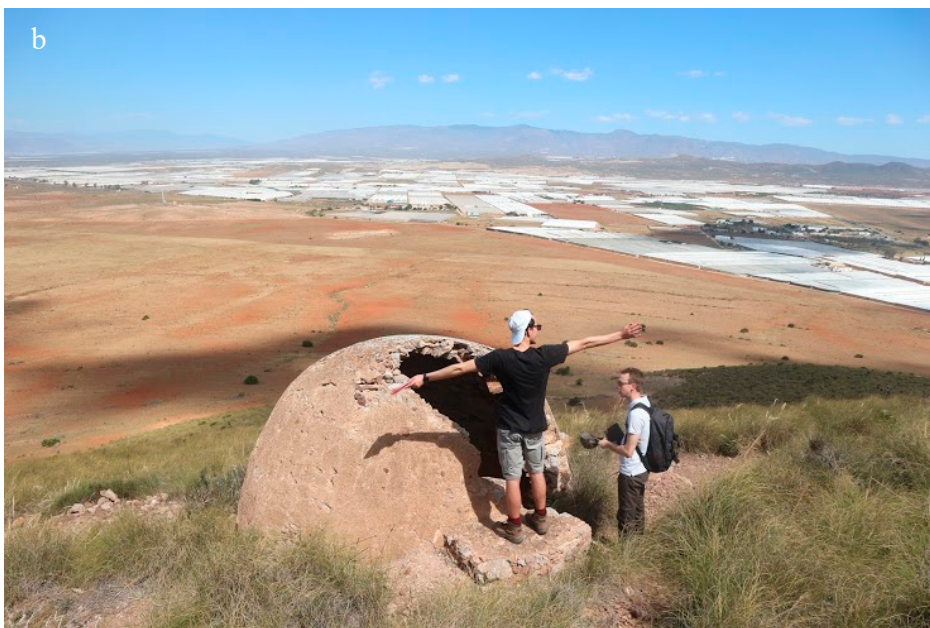

Not at all interesting      1      2      3      4      5      Extremely interesting

Please mention features of Cerro Pistolas that are very interesting to you in terms of scenic beauty (if any). \_\_\_\_\_

Geosite 6. Albaricoques: © Google Earth Images, February 2021.

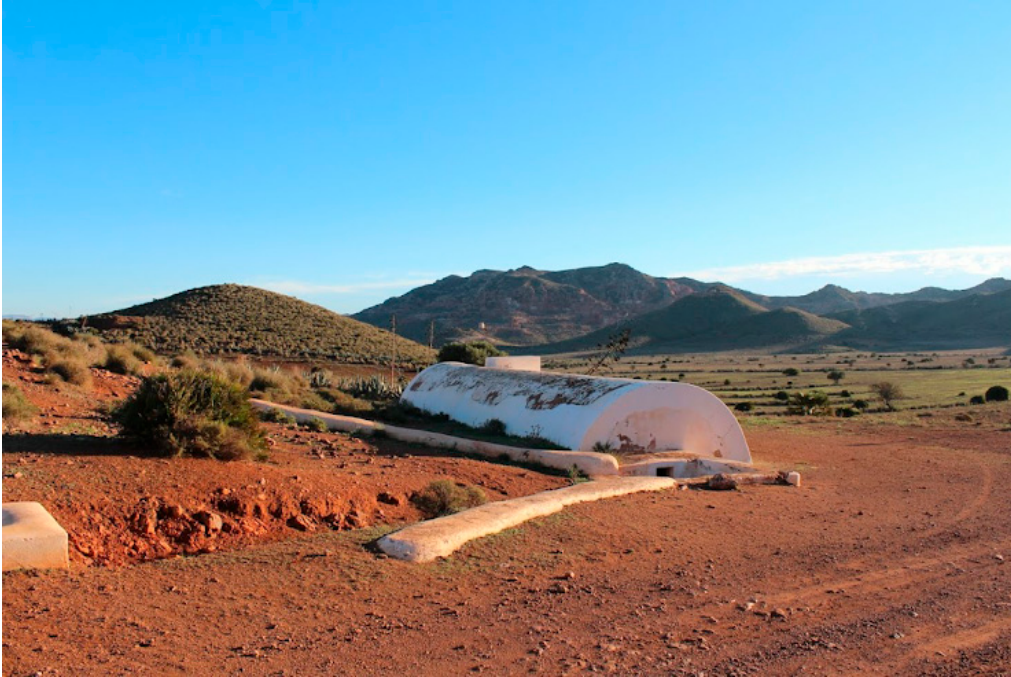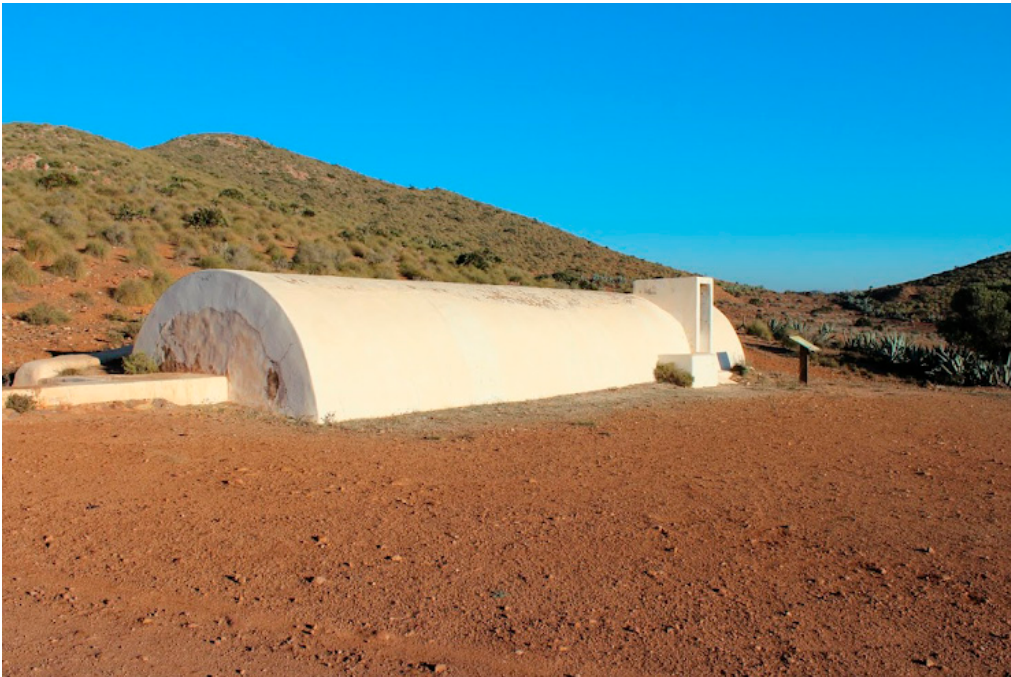

Not at all interesting      1      2      3      4      5      Extremely interesting

Please mention features of Albaricoques that are very interesting to you in terms of scenic beauty (if any). \_\_\_\_\_

Geosite 7. San Diego Mine: **a** © G. Tessema, May 2019; **b** © Google Earth Images, February 2021.

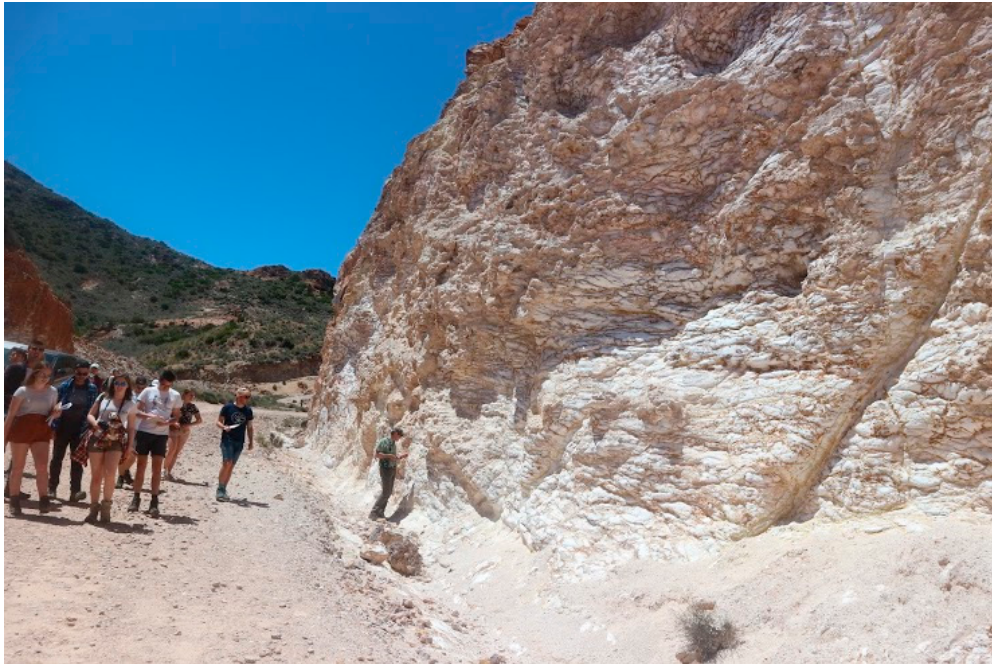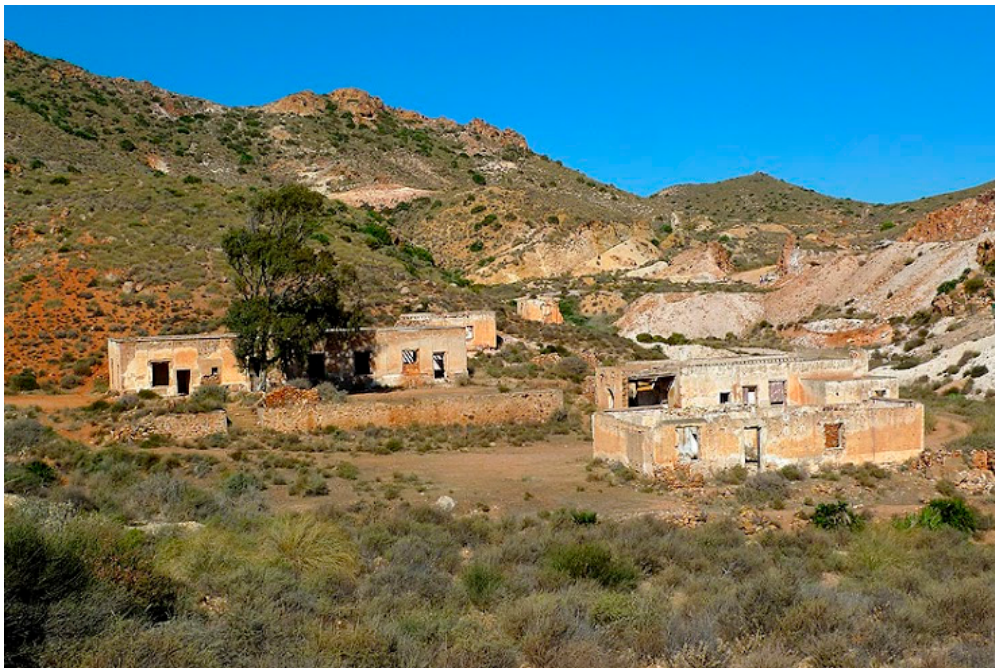

Not at all interesting      1      2      3      4      5      Extremely interesting

Please mention features of San Diego Mine that are very interesting to you in terms of scenic beauty (if any). \_\_\_\_\_

Geosite 8. Rodalquilar Mine: © G. Tessema, May 2019.

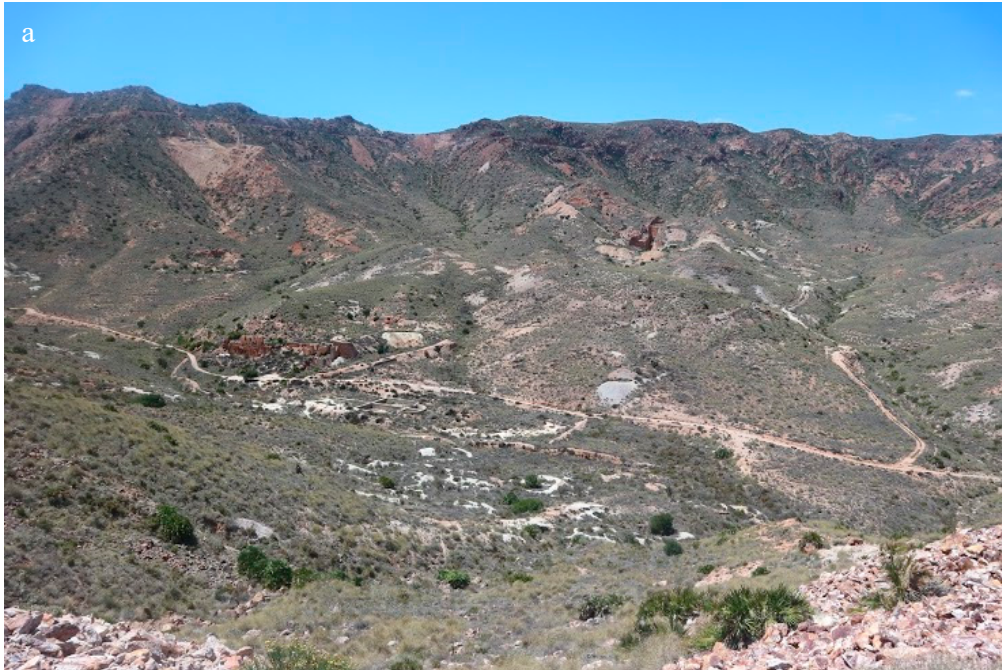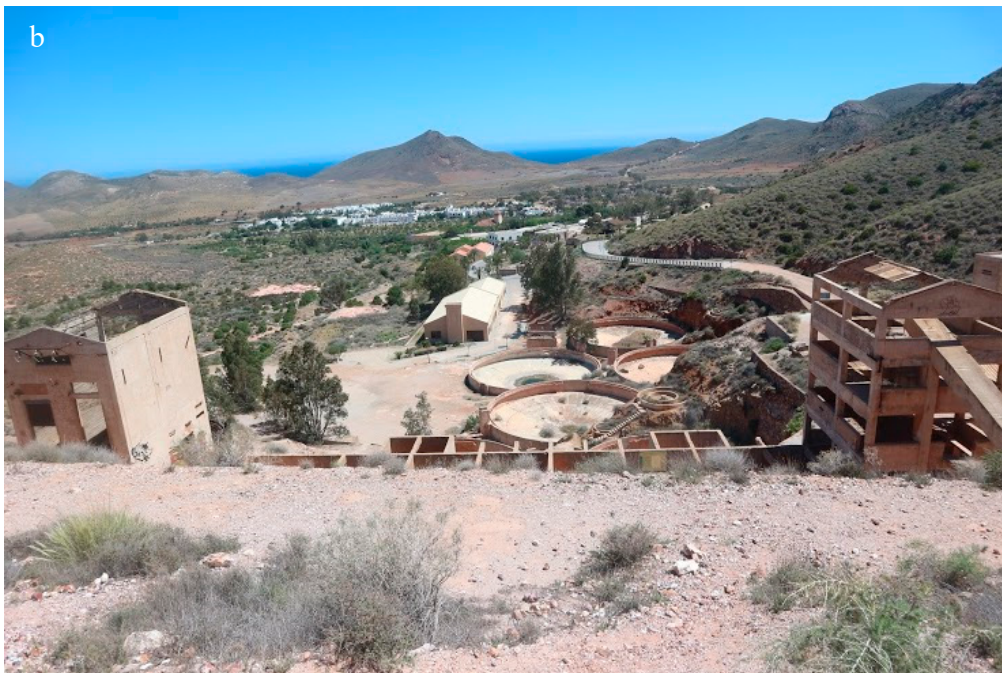

Not at all interesting    1    2    3    4    5    Extremely interesting

Please mention features of Rodalquilar Mine that are very interesting to you in terms of scenic beauty (if any). \_\_\_\_\_

Geosite 9. La Isleta del Moro: © G. Tessema, May 2019.

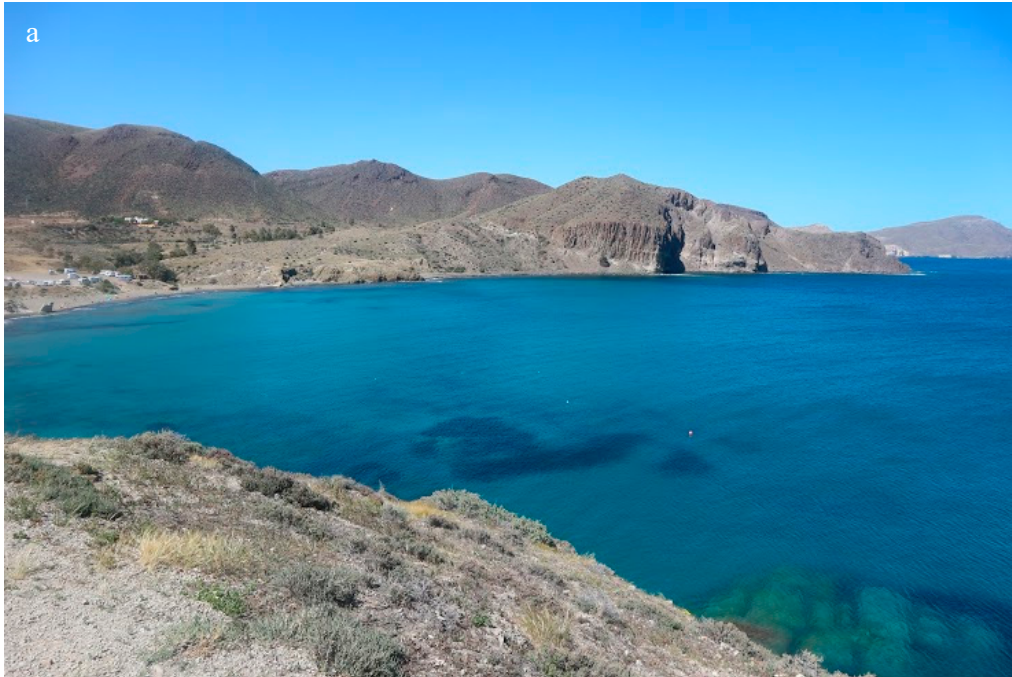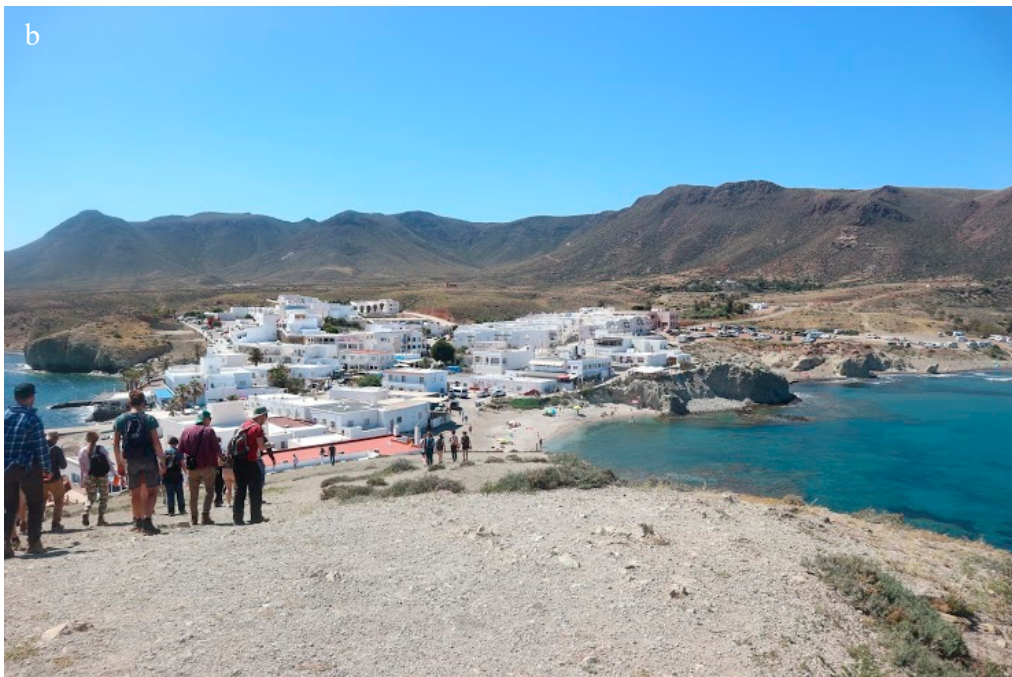

Not at all interesting      1      2      3      4      5      Extremely interesting

Please mention features of La Isleta del Moro that are very interesting to you in terms of scenic beauty (if any). \_\_\_\_\_

Geosite 10. Los Escullos: **a,c** © G. Tessema, May 2019; **b** © J. Poesen, May 2019.

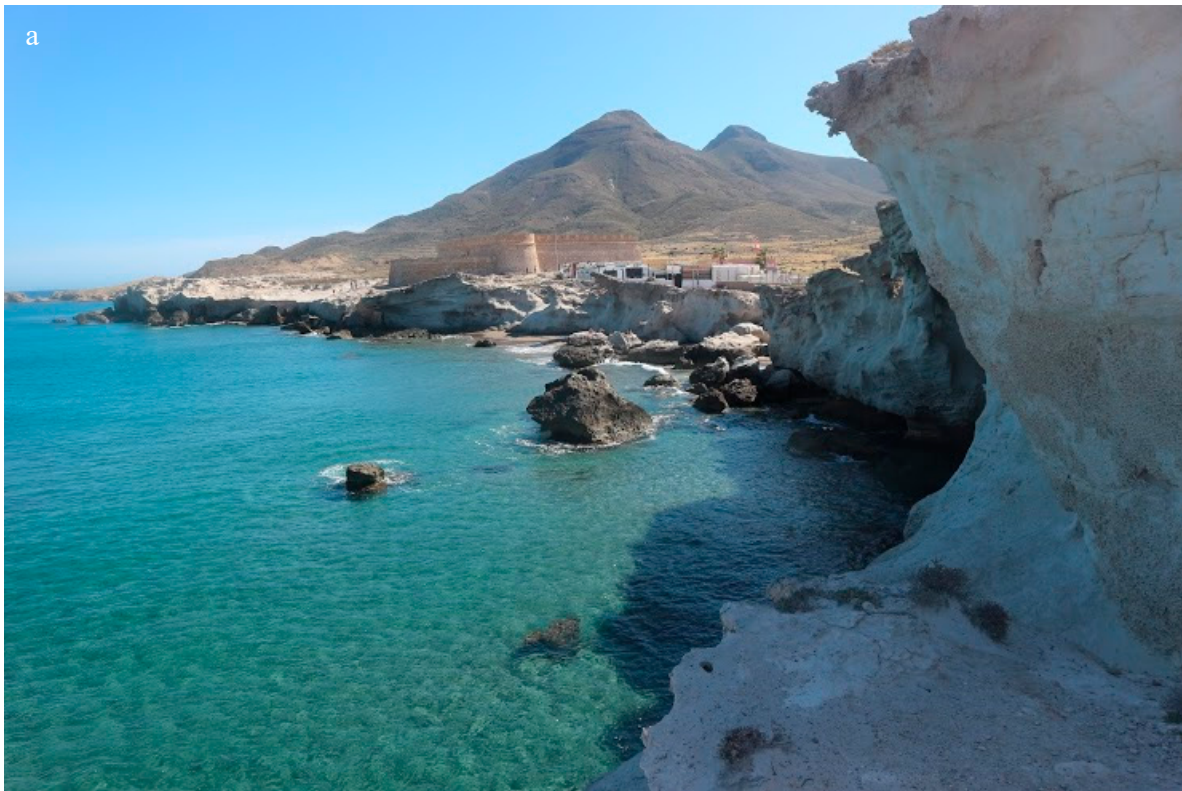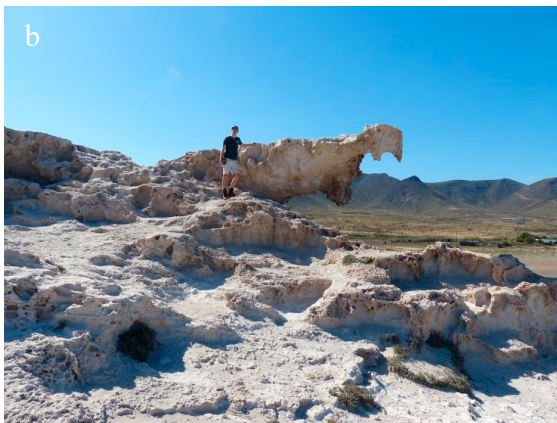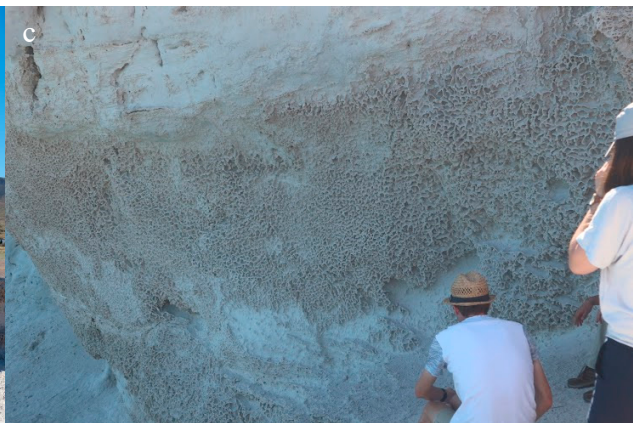

Not at all interesting      1      2      3      4      5      Extremely interesting

Please mention features of Los Escullos that are very interesting to you in terms of scenic beauty (if any).

---

Geosite 11. El Puntal: **a** © G. Tessema, May 2019; **b** © S. Hall<sup>2</sup>, 2015.

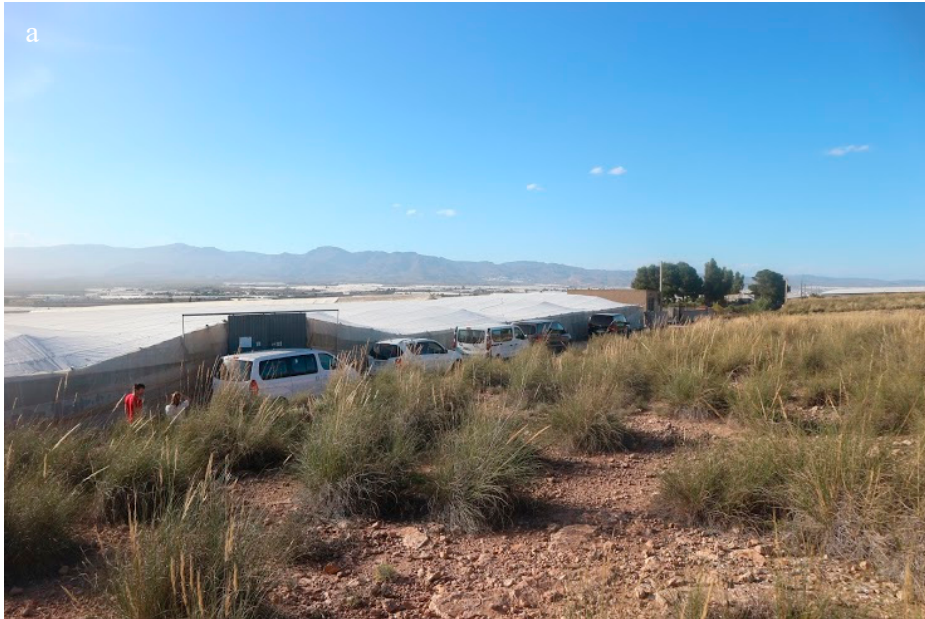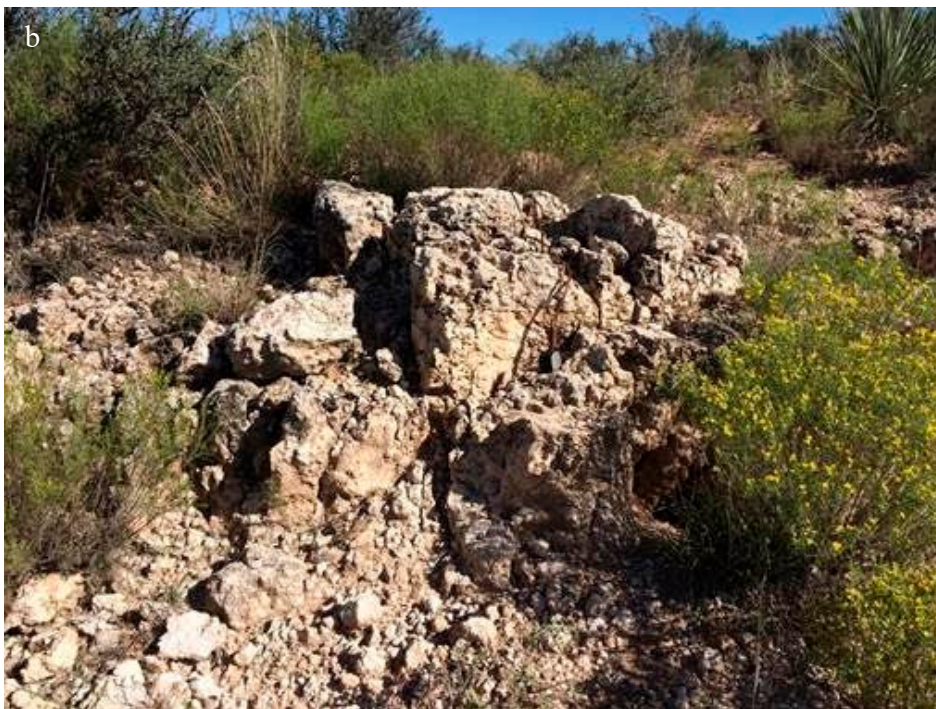

Not at all interesting      1      2      3      4      5      Extremely interesting

Please mention features of El Puntal that are very interesting to you in terms of scenic beauty (if any).

---

<sup>2</sup> <https://geology.com/rocks/caliche.shtml>

Geosite 12. Rambla Nogalte (river channel): **a** © G. Tessema, May 2019; **b** © iaguas.es<sup>3</sup>, February 2020.

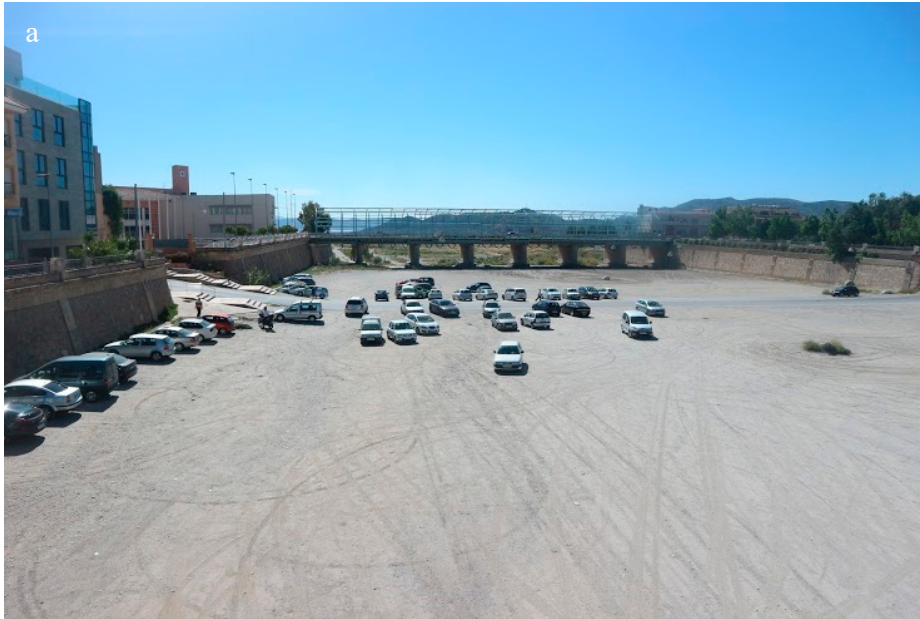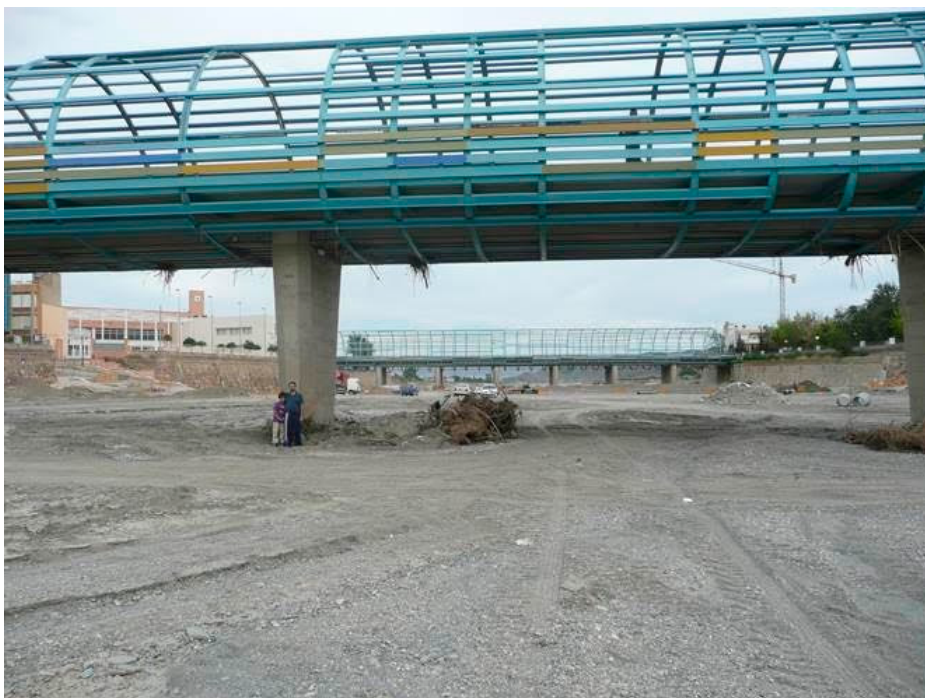

Not at all interesting      1      2      3      4      5      Extremely interesting

Please mention features of Rambla Nogalte that are very interesting to you in terms of scenic beauty (if any). \_\_\_\_\_

<sup>3</sup> <https://www.iagua.es/blogs/raul-herrero/necesidad-de-cooperacion-para-la-defensa-frente-avenidas-el-caso-de-la-rambla-de-nogalte-en-puerto-l>

Geosite 13. Lorca Castle viewpoint: © G. Tessema, May 2019.

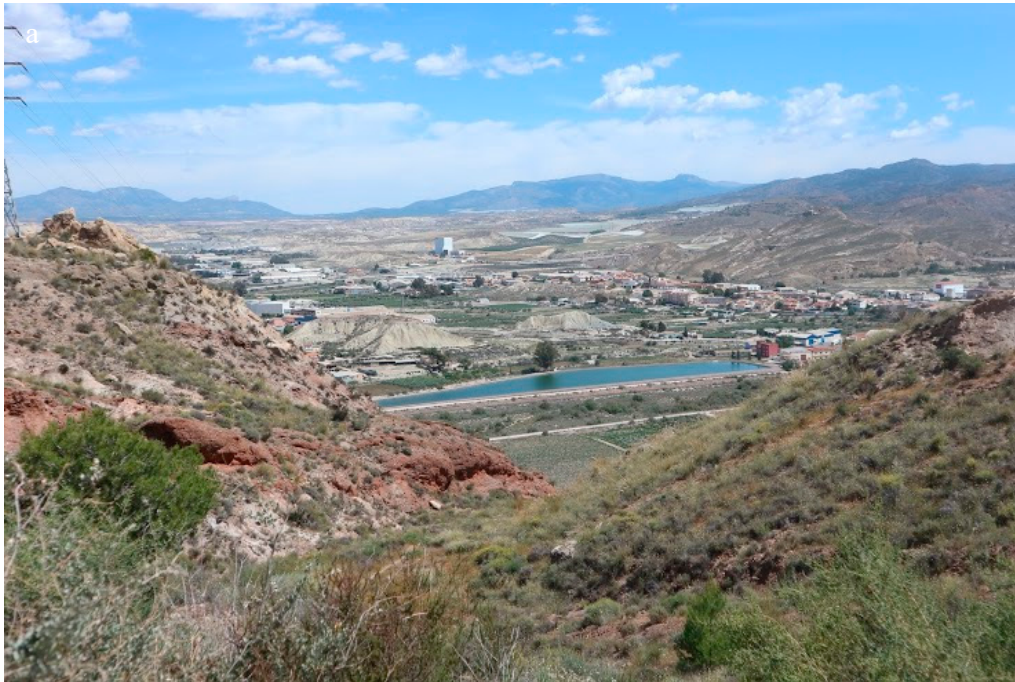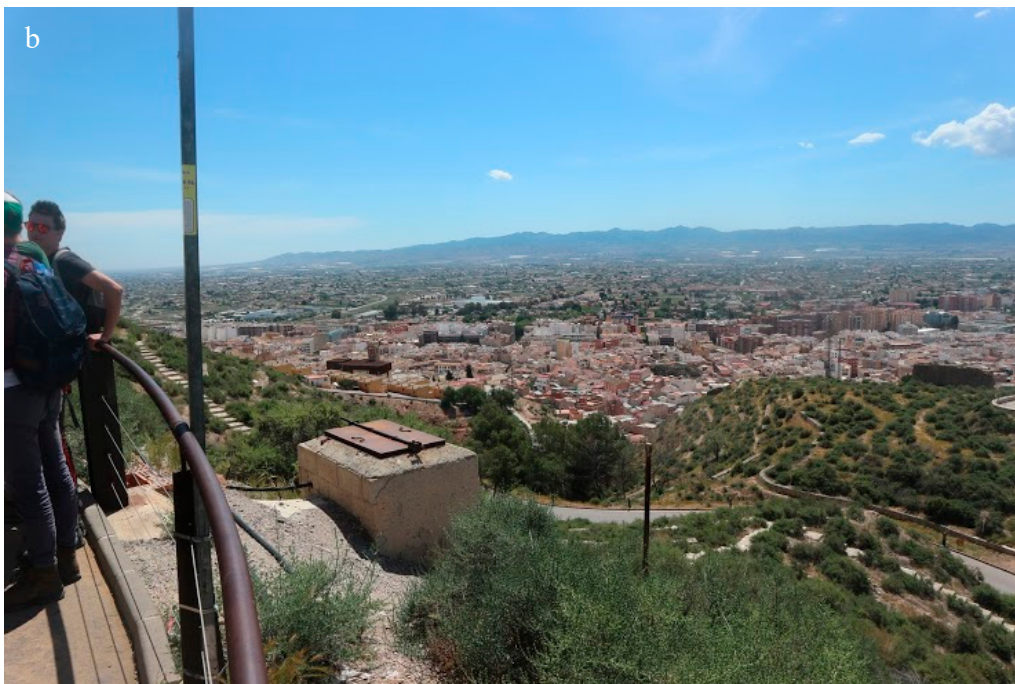

Not at all interesting    1    2    3    4    5    Extremely interesting

Please mention features of Lorca Castle viewpoint that are very interesting to you in terms of scenic beauty (if any). \_\_\_\_\_

Geosite 14. Puentes Dam: © G. Tessema, May 2019.

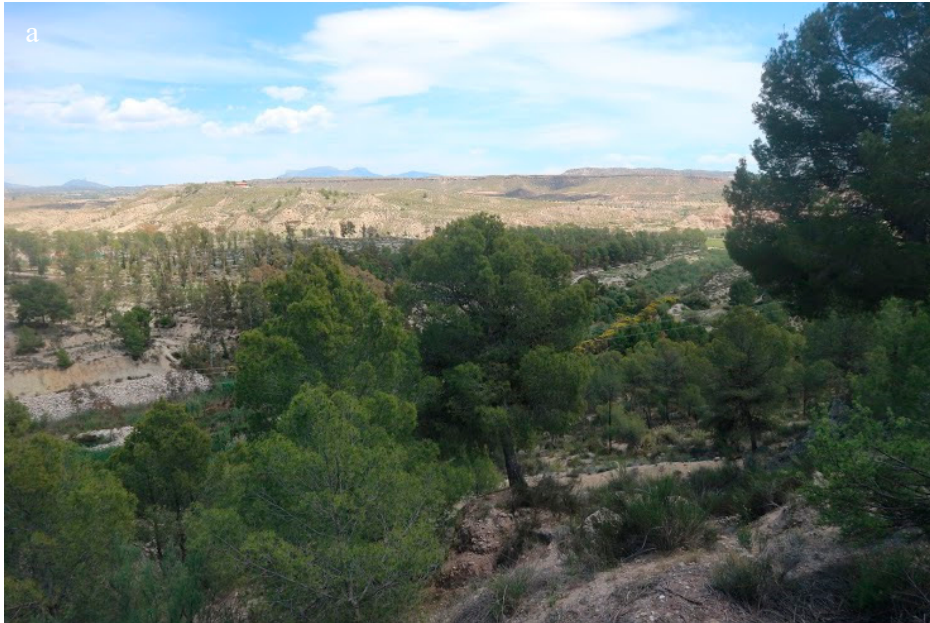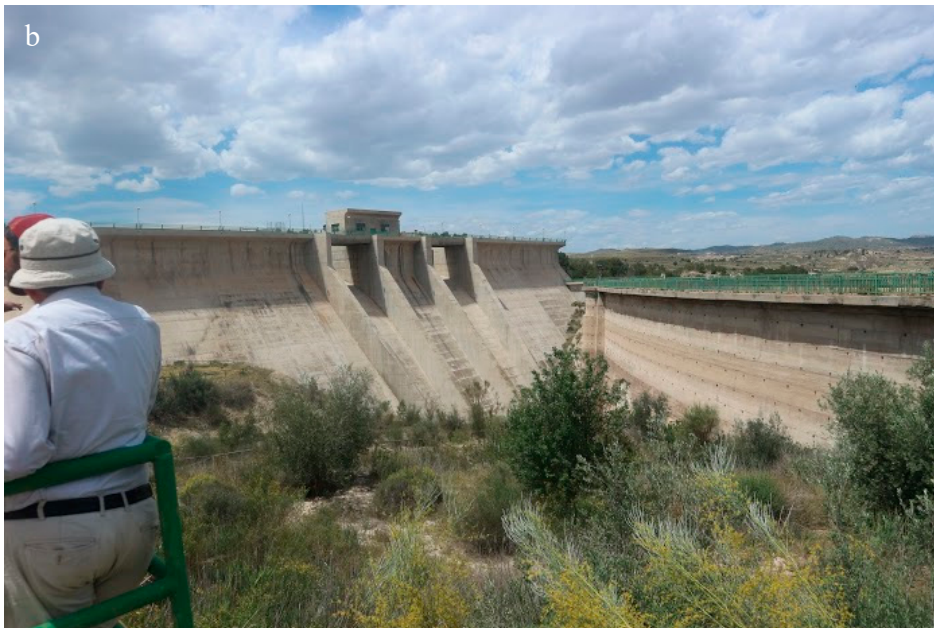

Not at all interesting      1      2      3      4      5      Extremely interesting

Please mention features of Puentes Dam that are very interesting to you in terms of scenic beauty (if any). \_\_\_\_\_

Geosite 15. Rambla Salada: **a** ©J. Poesen, May 2019; **b** © G. Tessema, May 2019.

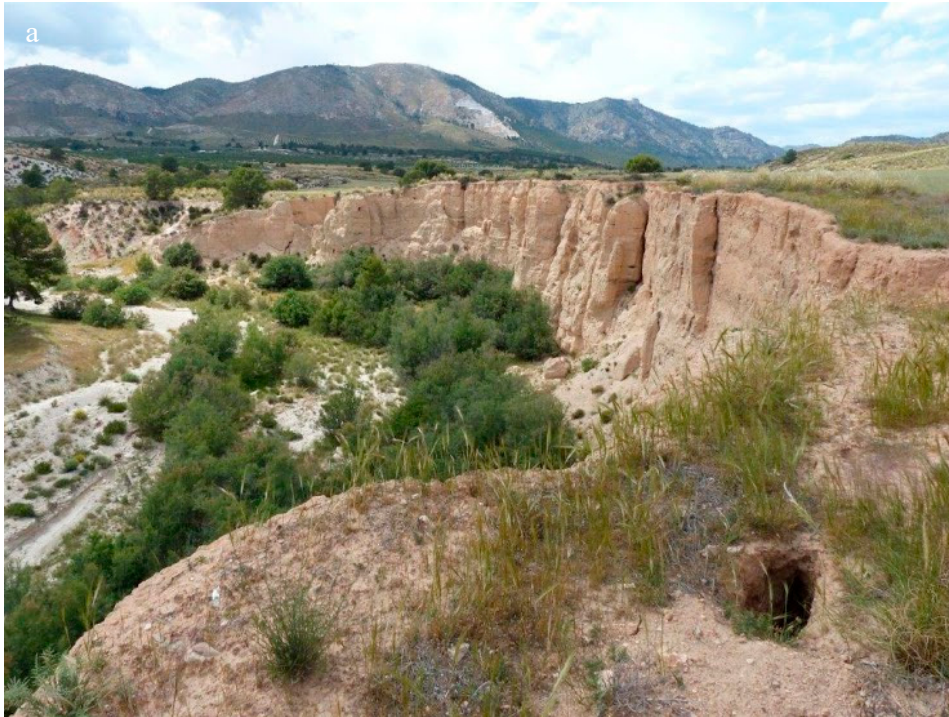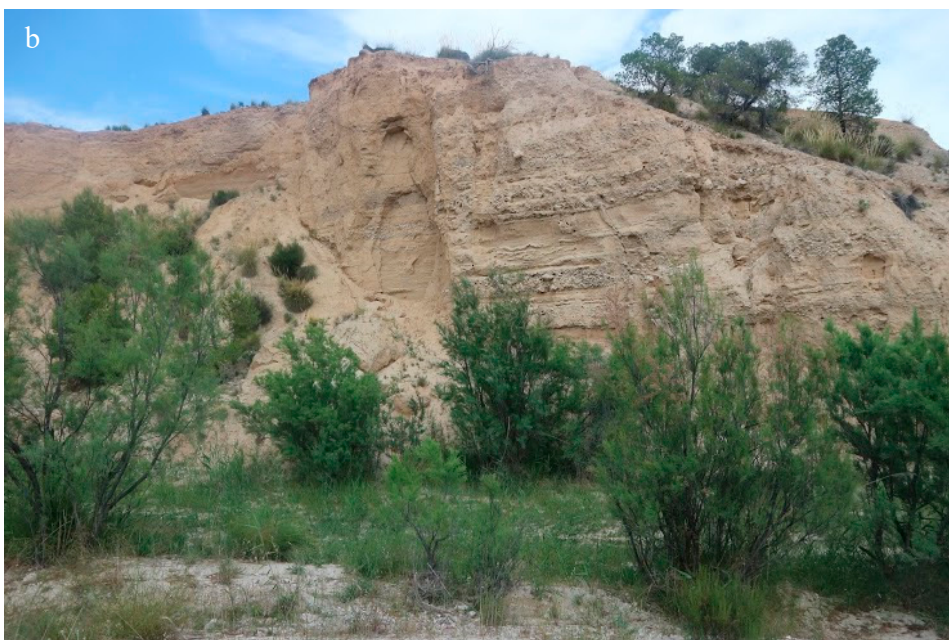

Not at all interesting      1      2      3      4      5      Extremely interesting

Please mention features of Rambla Salada that are very interesting to you in terms of scenic beauty (if any). \_\_\_\_\_

Geosite 16. Sierra de la Torrecilla: © G. Tessema, May 2019.

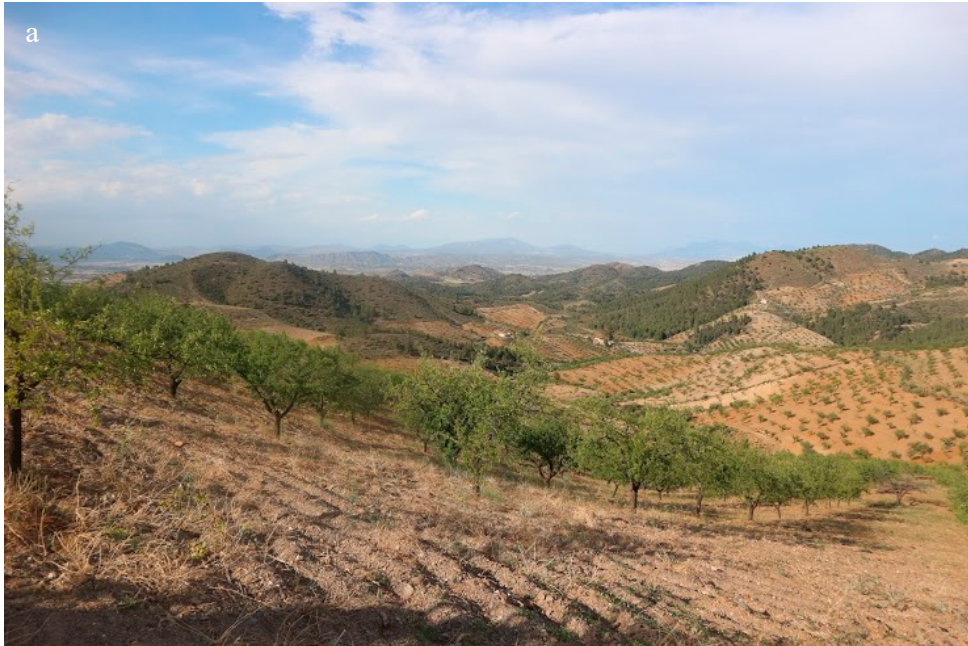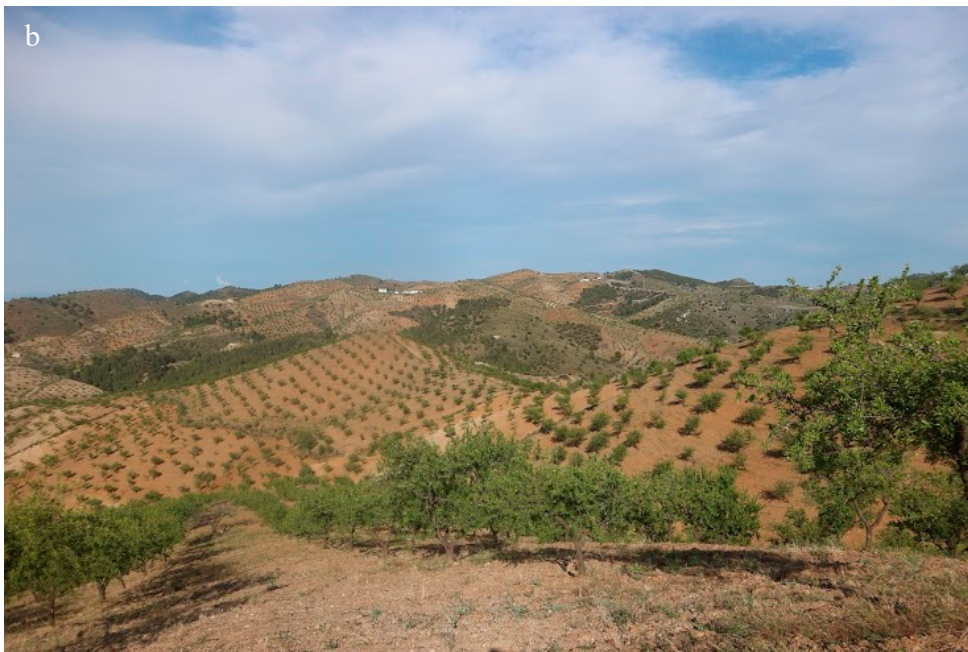

Not at all interesting      1      2      3      4      5      Extremely interesting

Please mention features of Sierra de la Torrecilla that are very interesting to you in terms of scenic beauty (if any). \_\_\_\_\_

Geosite 17. Rio Alias: © G. Tessema, May 2019.

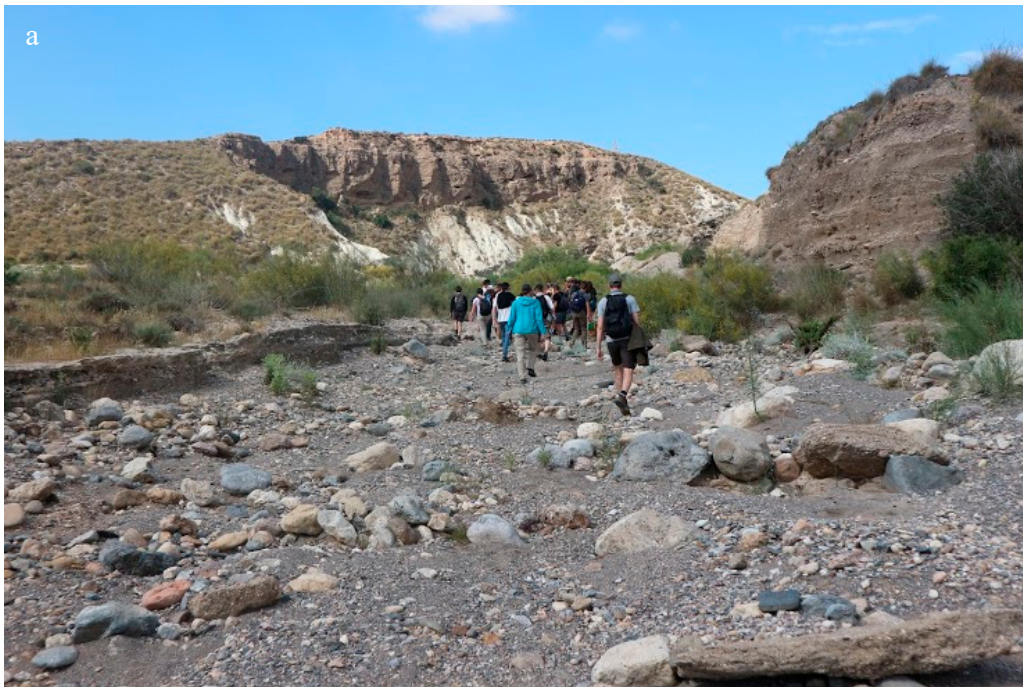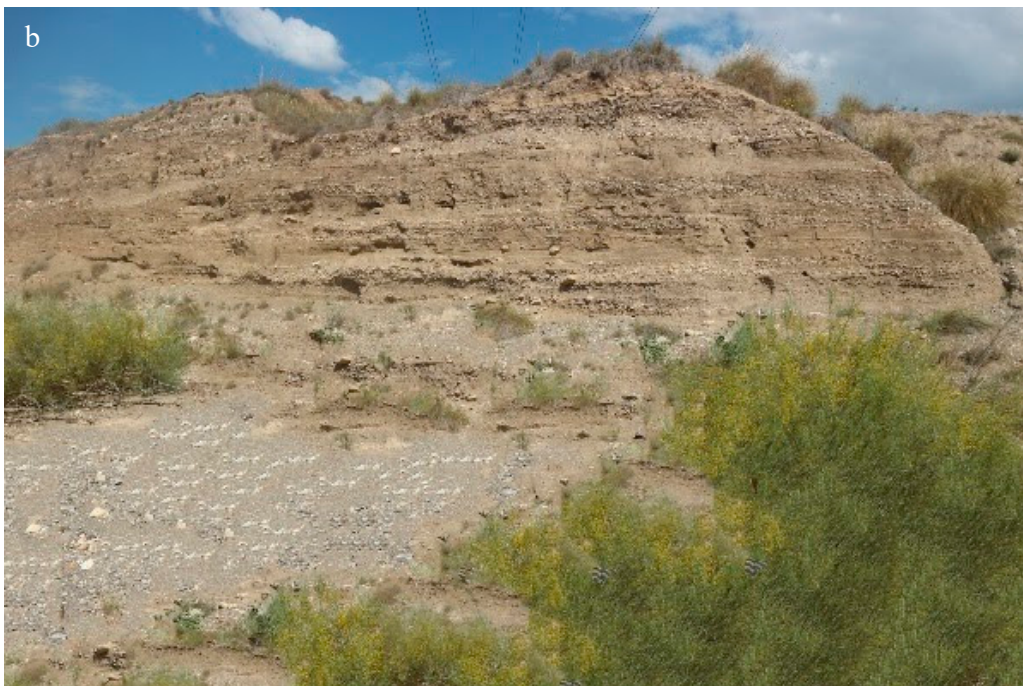

Not at all interesting      1      2      3      4      5      Extremely interesting

Please mention features of Rio Alias that are very interesting to you in terms of scenic beauty (if any).

---

Geosite 18. Rambla de los Feos: © G. Tessema, May 2019.

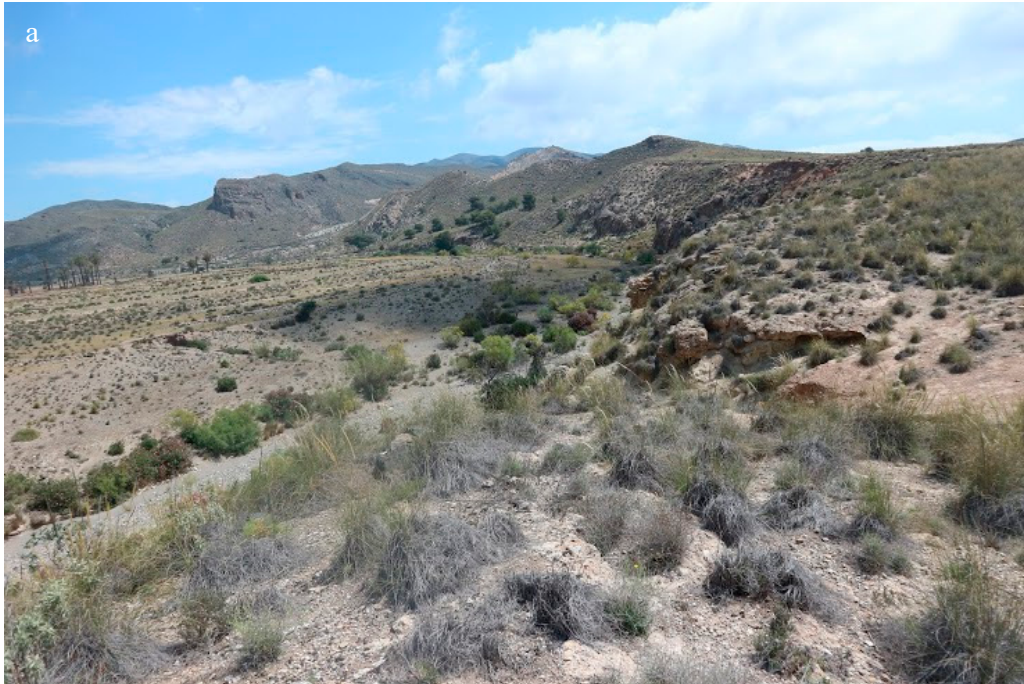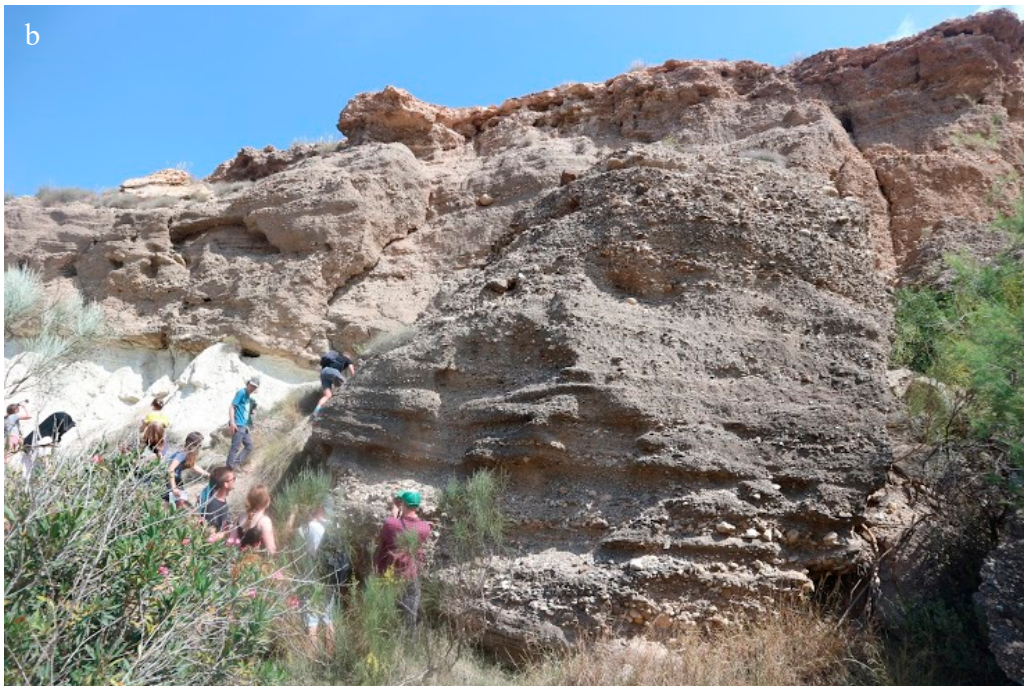

Not at all interesting      1      2      3      4      5      Extremely interesting

Please mention features of Rambla de los Feos that are very interesting to you in terms of scenic beauty (if any). \_\_\_\_\_

Geosite 19. Los Perales: **a,c** © G. Tessema, May 2019; **b** © J. Poesen, April 2011.

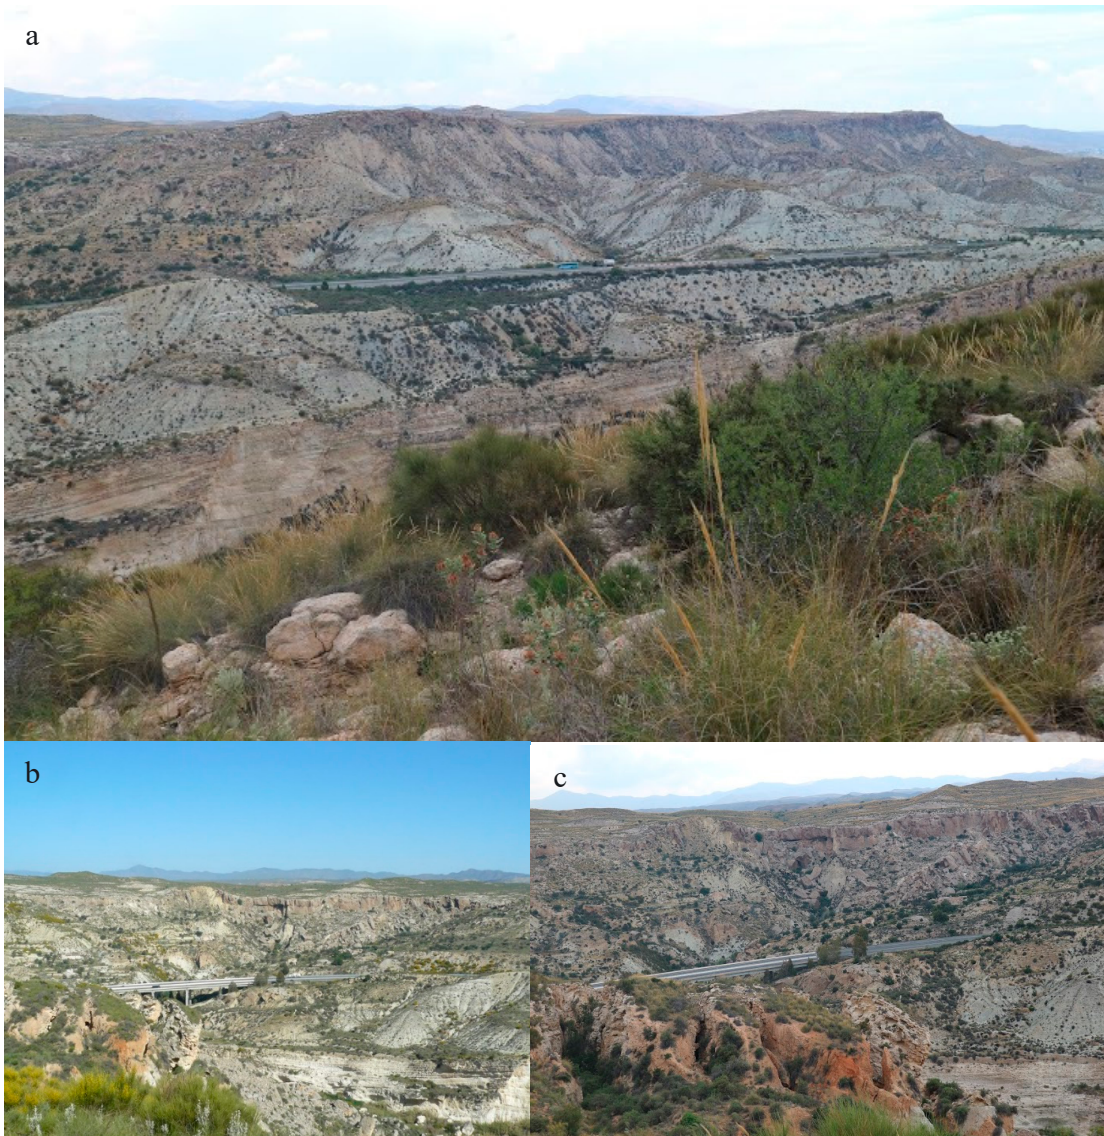

Not at all interesting      1      2      3      4      5      Extremely interesting

Please mention features of Los Perales that are very interesting to you in terms of scenic beauty (if any).

---

Geosite 20. Los Molinos: **a** © G. Tessema, May 2019; **b** © Google Earth Images, February 2021

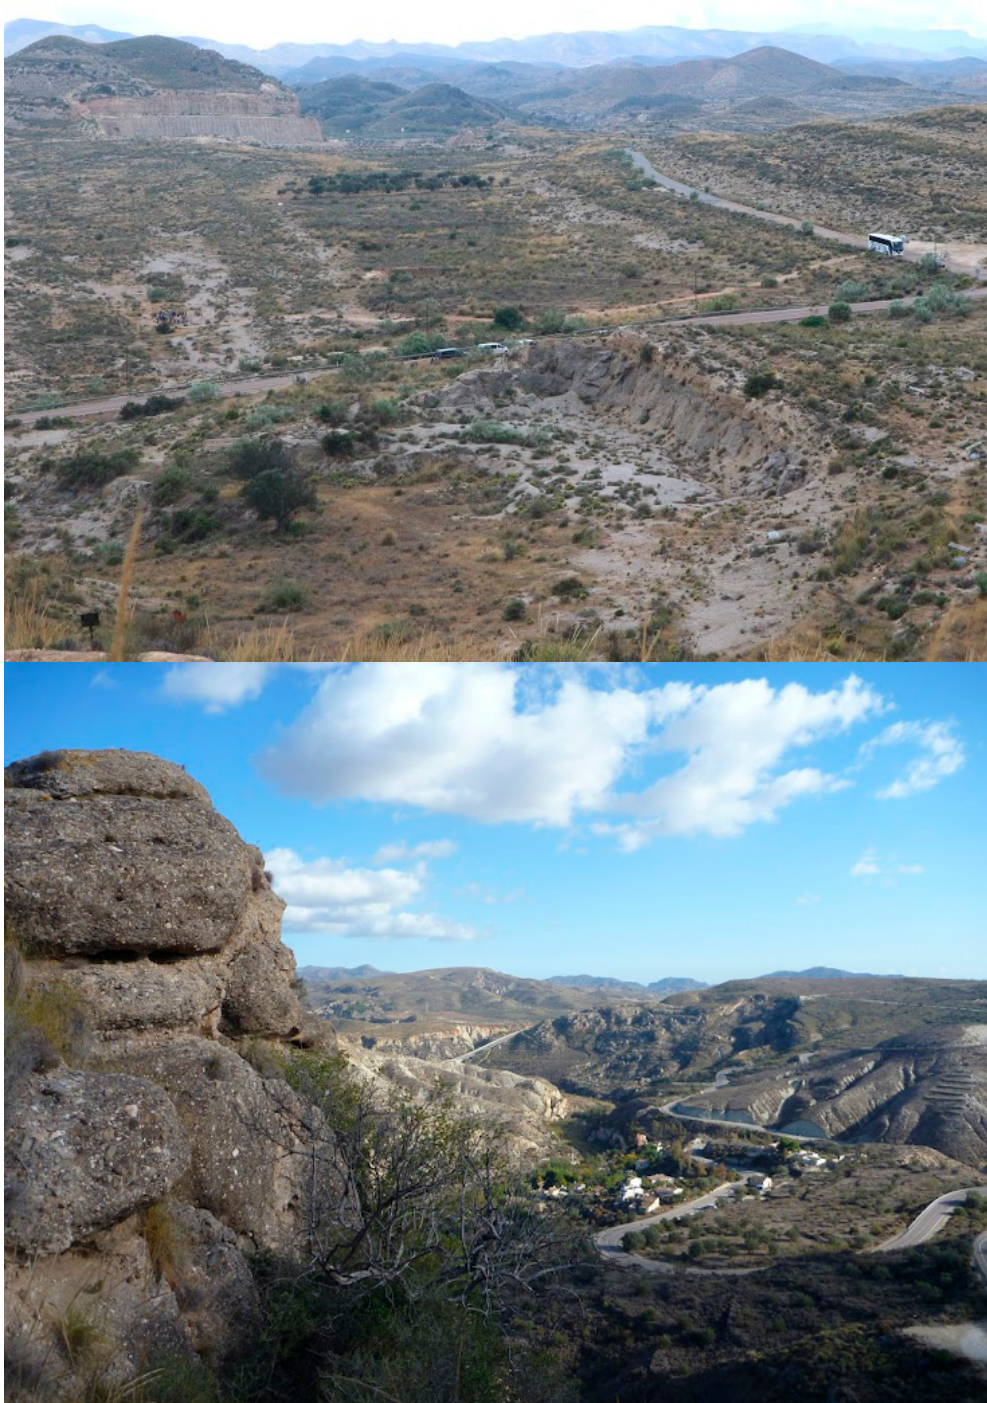

Not at all interesting      1      2      3      4      5      Extremely interesting

Please mention features of Los Molinos that are very interesting to you in terms of scenic beauty (if any). \_\_\_\_\_

Geosite 21. Lucainena de las Torres: © G. Tessema, May 2019.

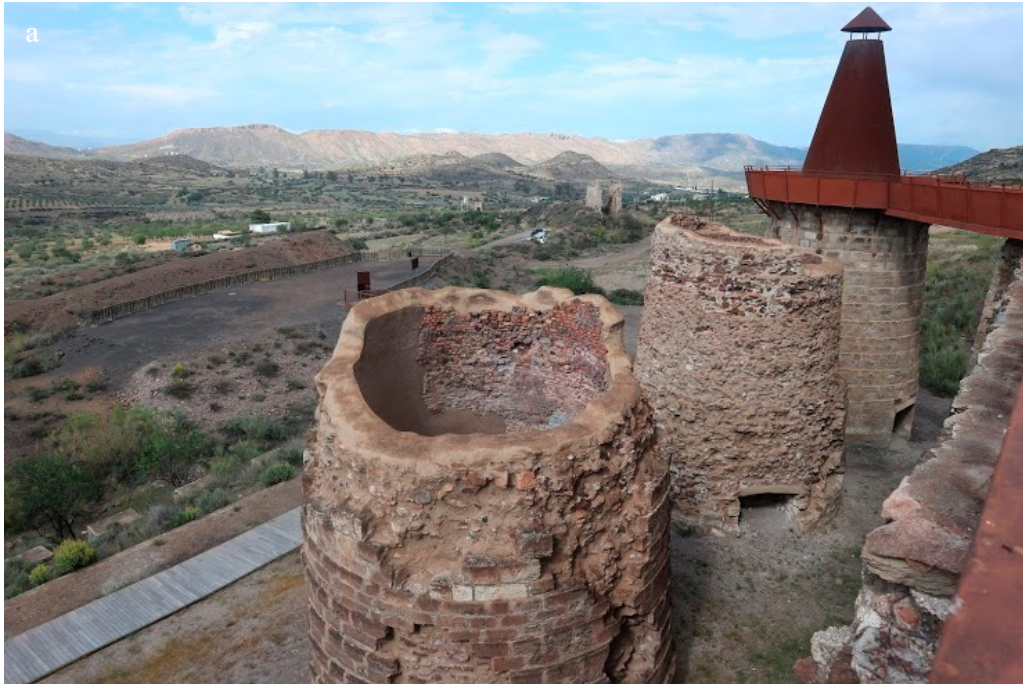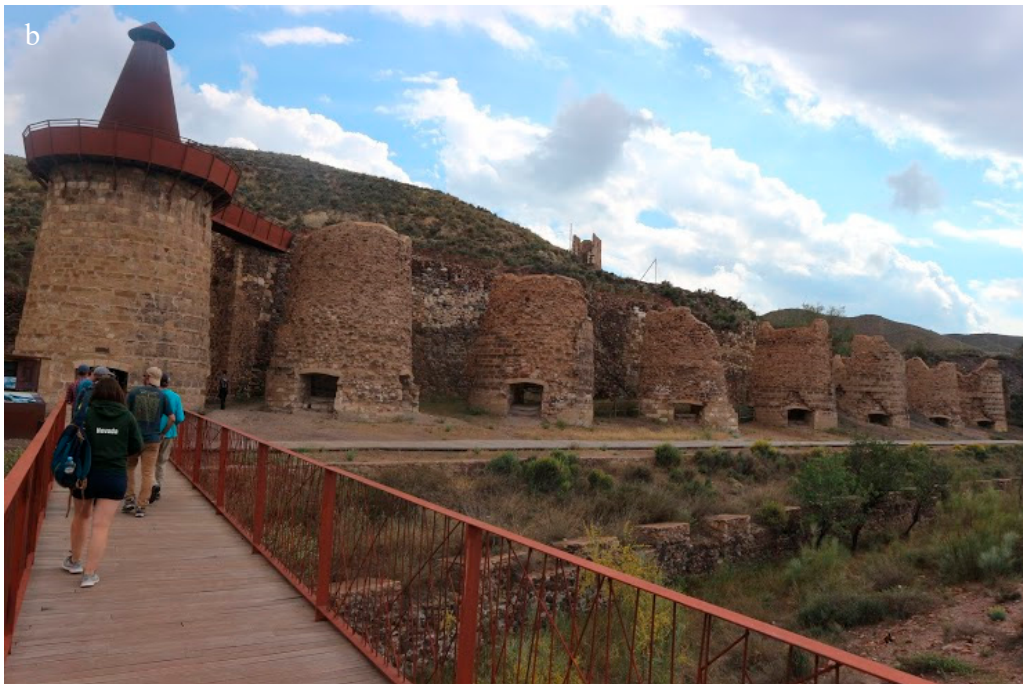

Not at all interesting      1      2      3      4      5      Extremely interesting

Please mention features of Lucainena de las Torres that are very interesting to you in terms of scenic beauty (if any). \_\_\_\_\_

Geosite 22. Los Yesos: © G. Tessema, May 2019.

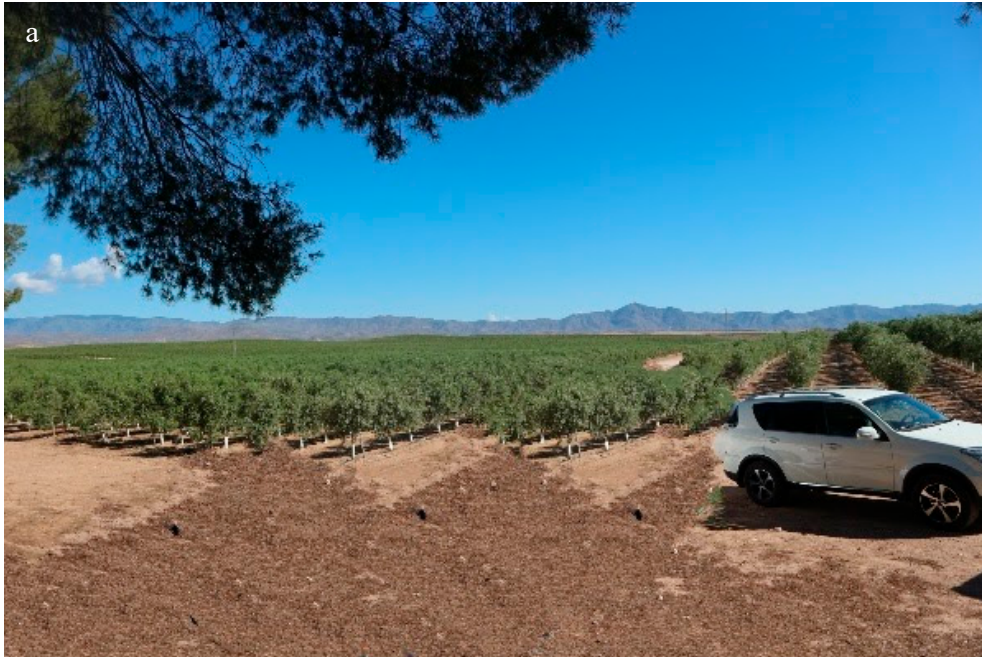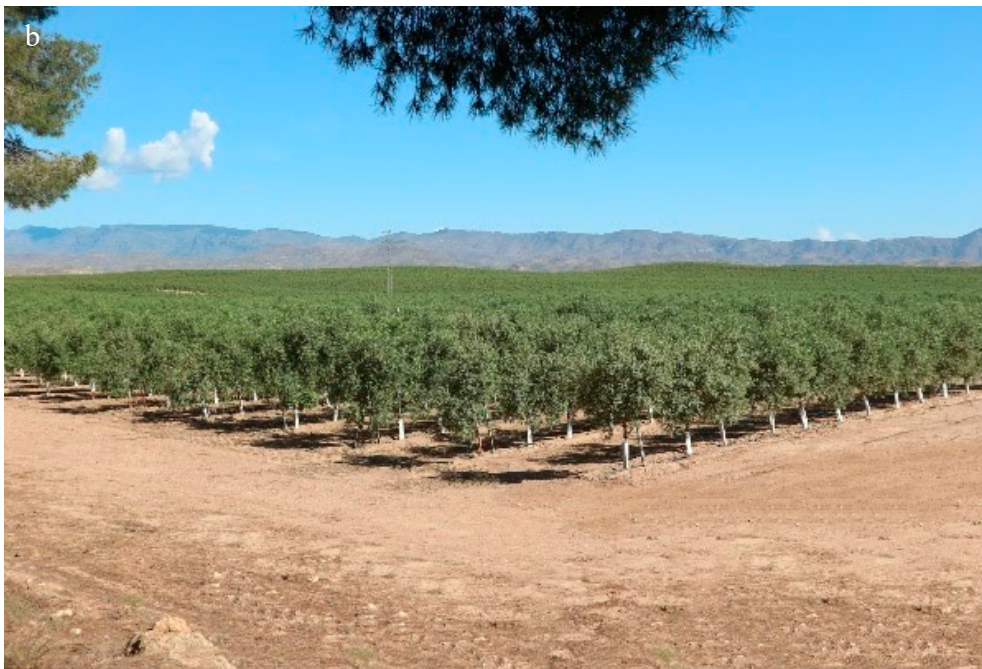

Not at all interesting      1      2      3      4      5      Extremely interesting

Please mention features of Los Yesos that are very interesting to you in terms of scenic beauty (if any).

---

Geosite 23. Los Millares: **a** © G. Tessema, May 2019; **b** © Soleá<sup>4</sup>, July 2020.

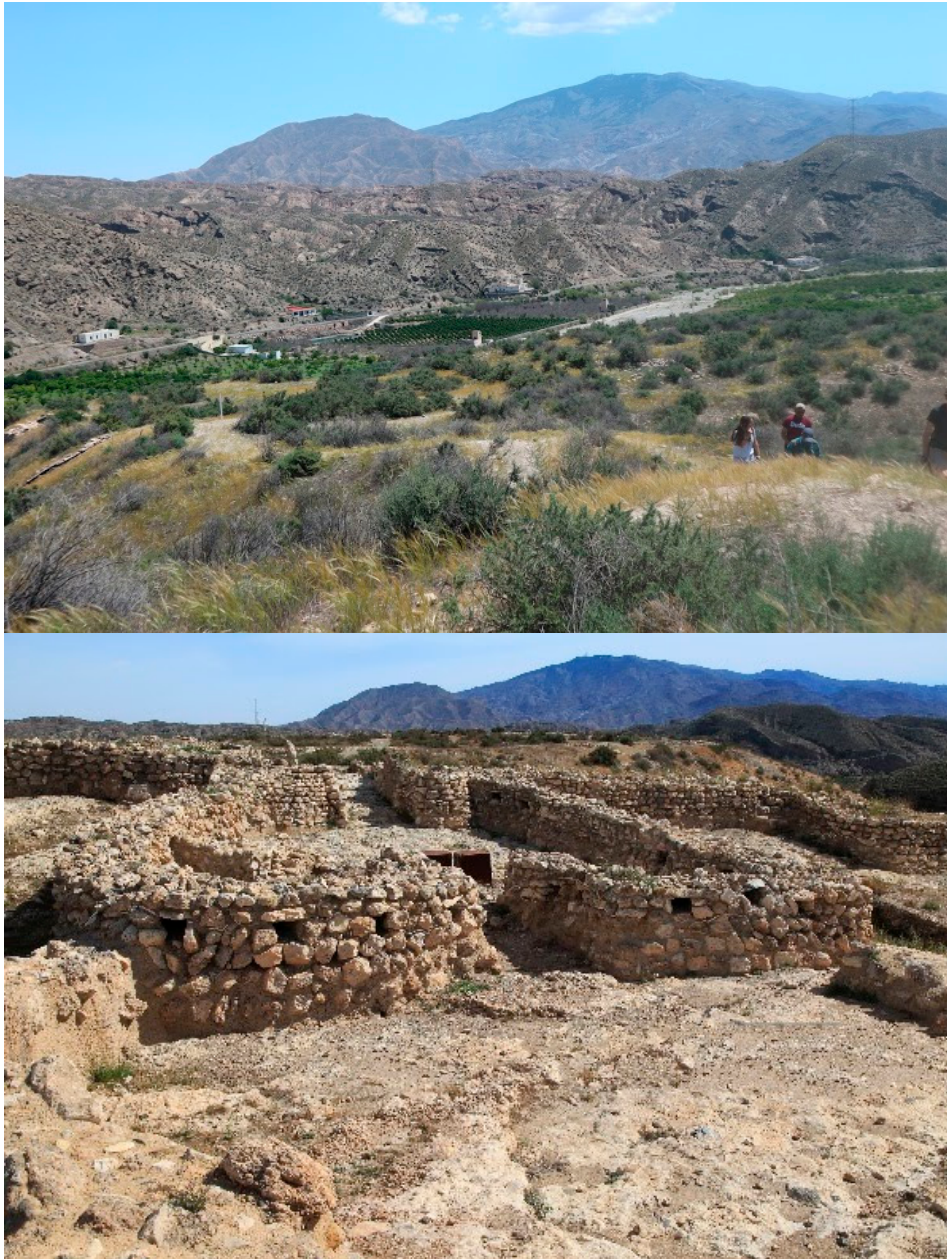

Not at all interesting      1      2      3      4      5      Extremely interesting

Please mention features of Los Millares that are very interesting to you in terms of scenic beauty (if any).

---

<sup>4</sup> <https://porsolea.com/los-millares-ruta-parques-arqueologicos-de-espana/>

Geosite 24. Bar Alfaro: **a,b** © J. Poesen, May 2019; **c** © G. Tessema, May 2019.

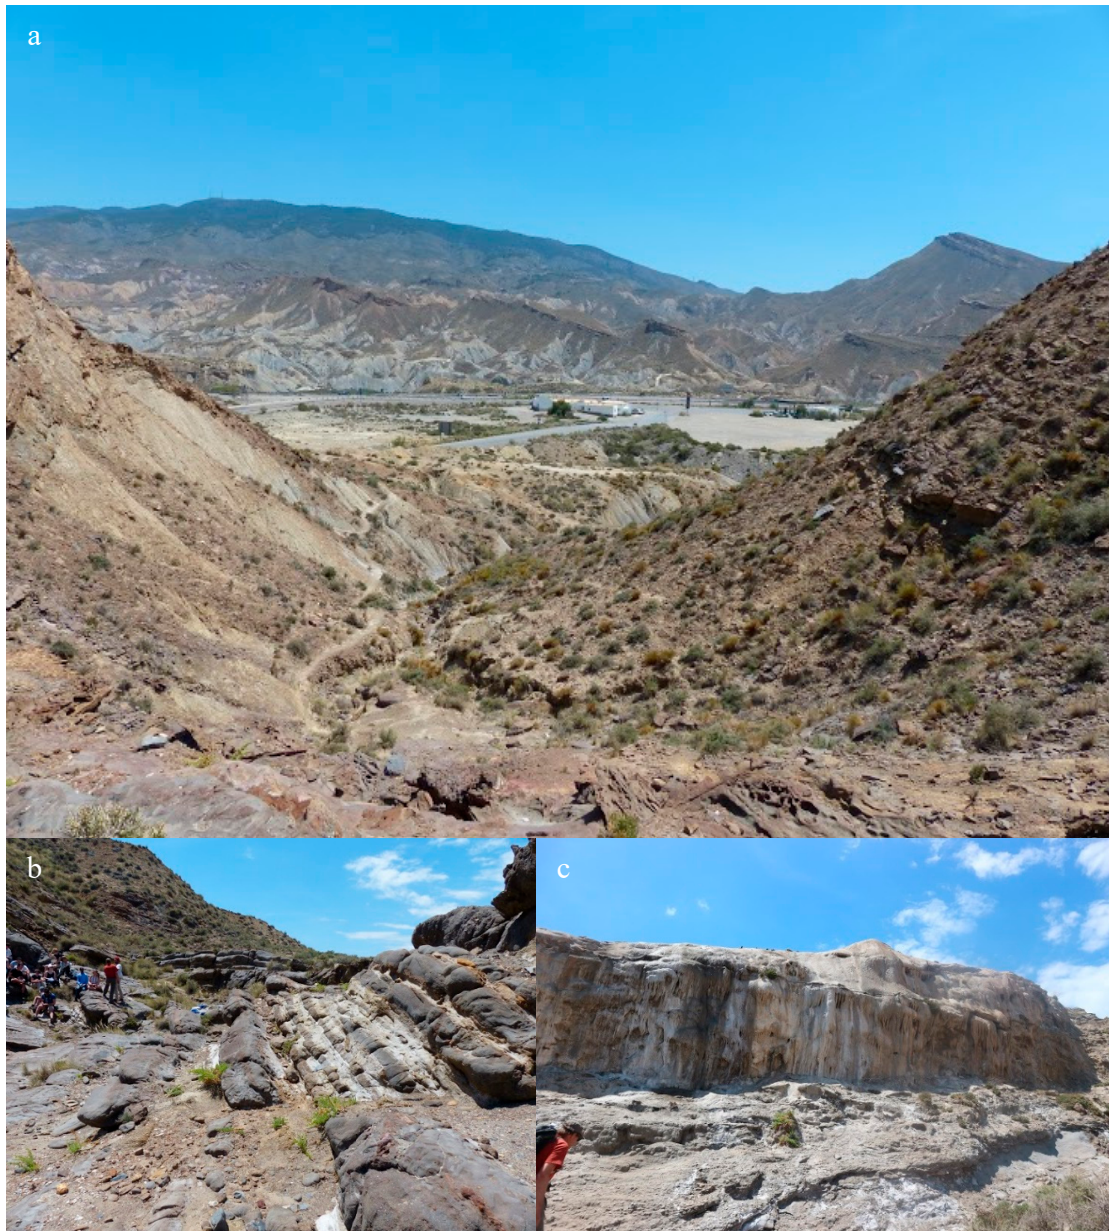

Not at all interesting      1      2      3      4      5      Extremely interesting

Please mention features of Bar Alfaro that are very interesting to you in terms of scenic beauty (if any).

---

Geosite 25. Mini Hollywood: © G. Tessema, May 2019.

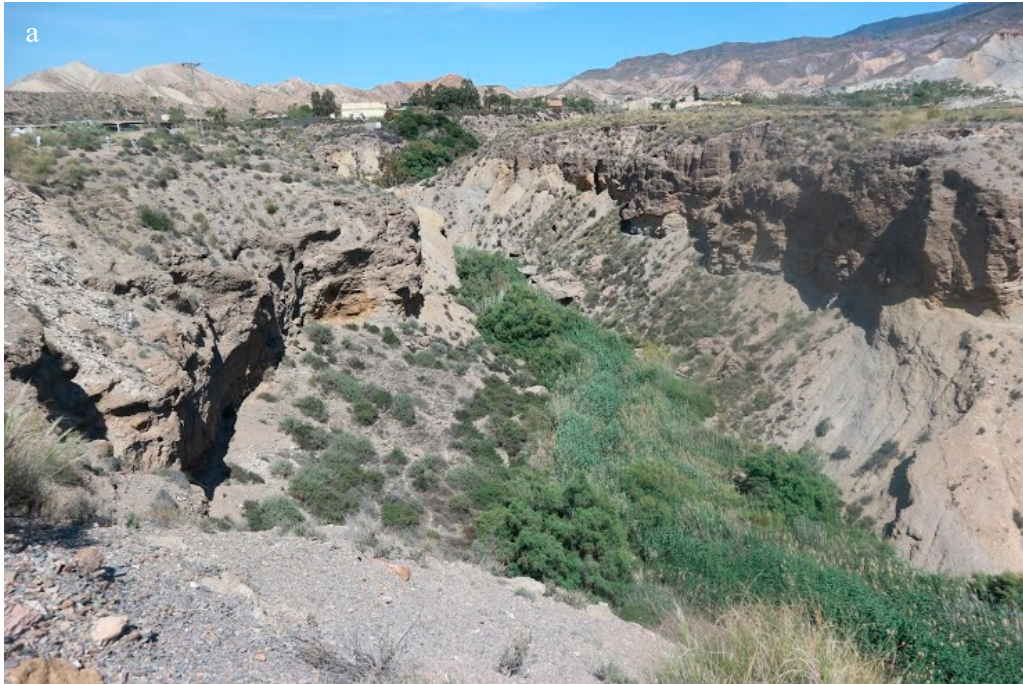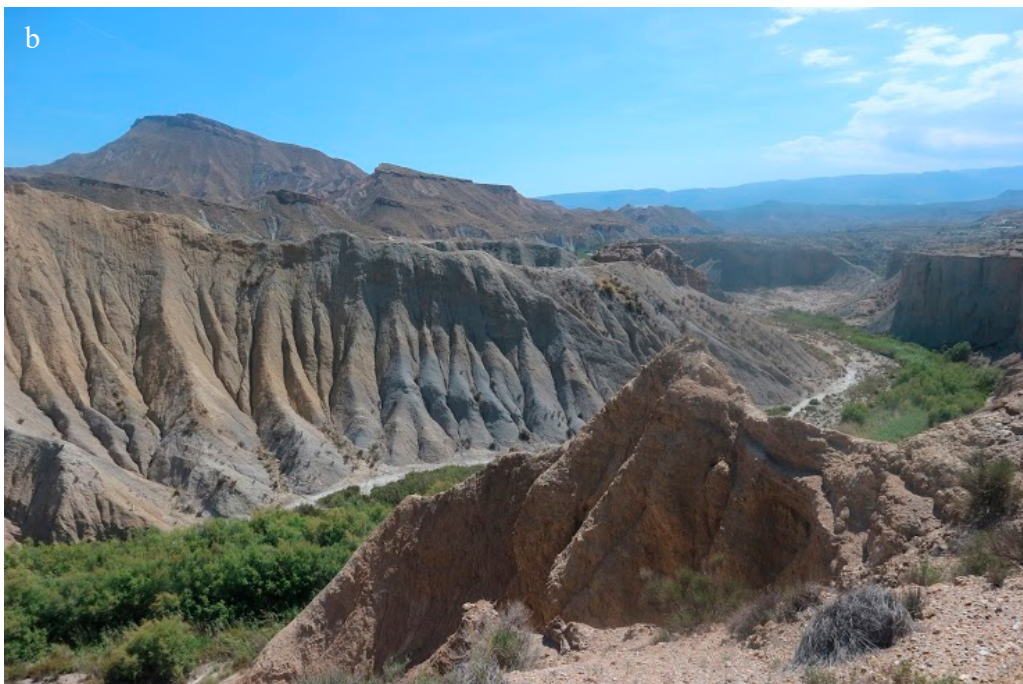

Not at all interesting    1    2    3    4    5    Extremely interesting

Please mention features of Mini Hollywood that are very interesting to you in terms of scenic beauty (if any). \_\_\_\_\_

Geosite 26. Rambla Honda: © G. Tessema, May 2019.

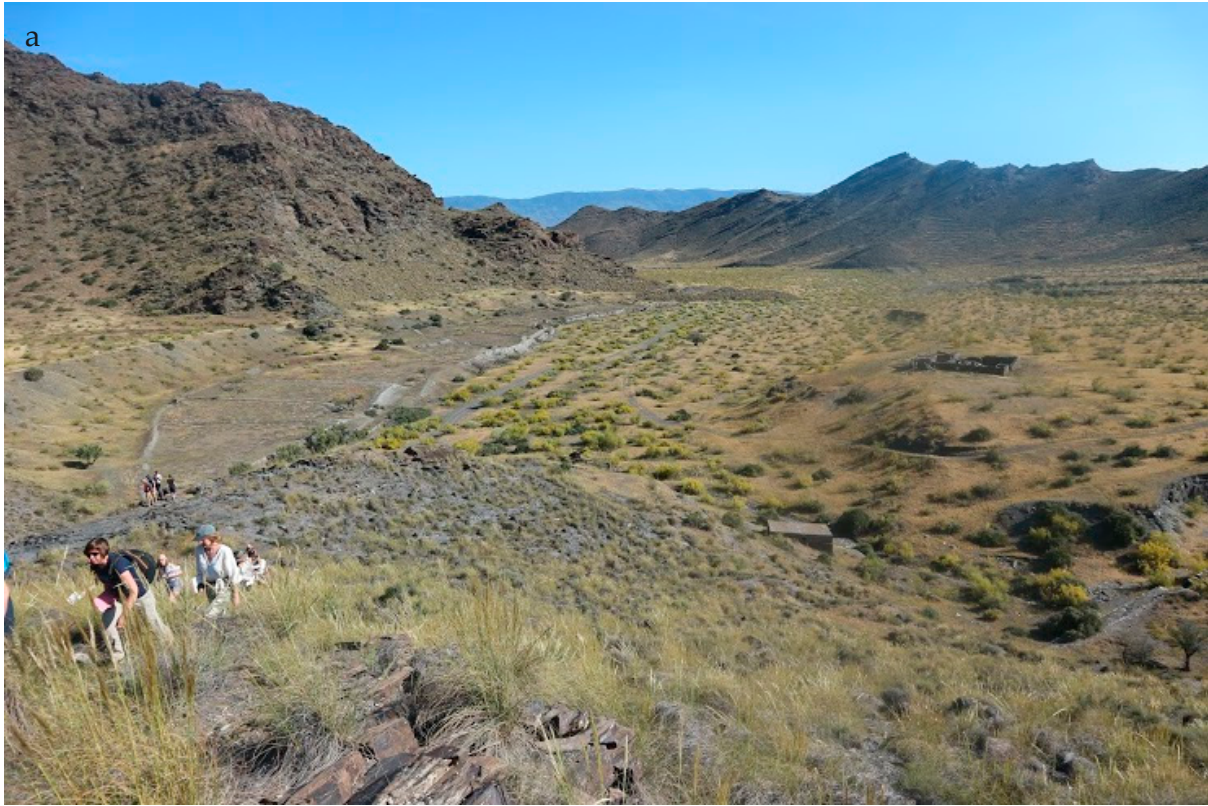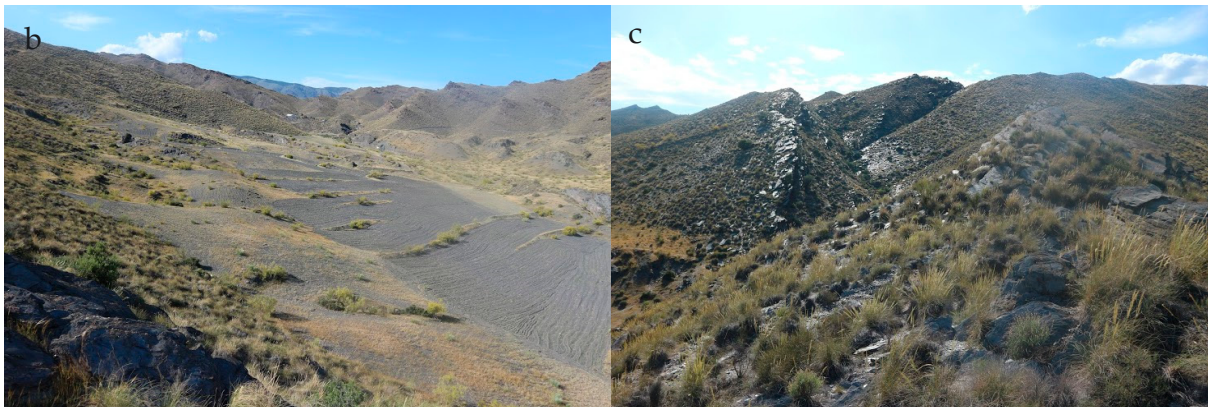

Not at all interesting    1    2    3    4    5    Extremely interesting

Please mention features of Rambla Honda that are very interesting to you in terms of scenic beauty (if any). \_\_\_\_\_

Geosite 27. La Calahorra castle: © G. Tessema, May 2019.

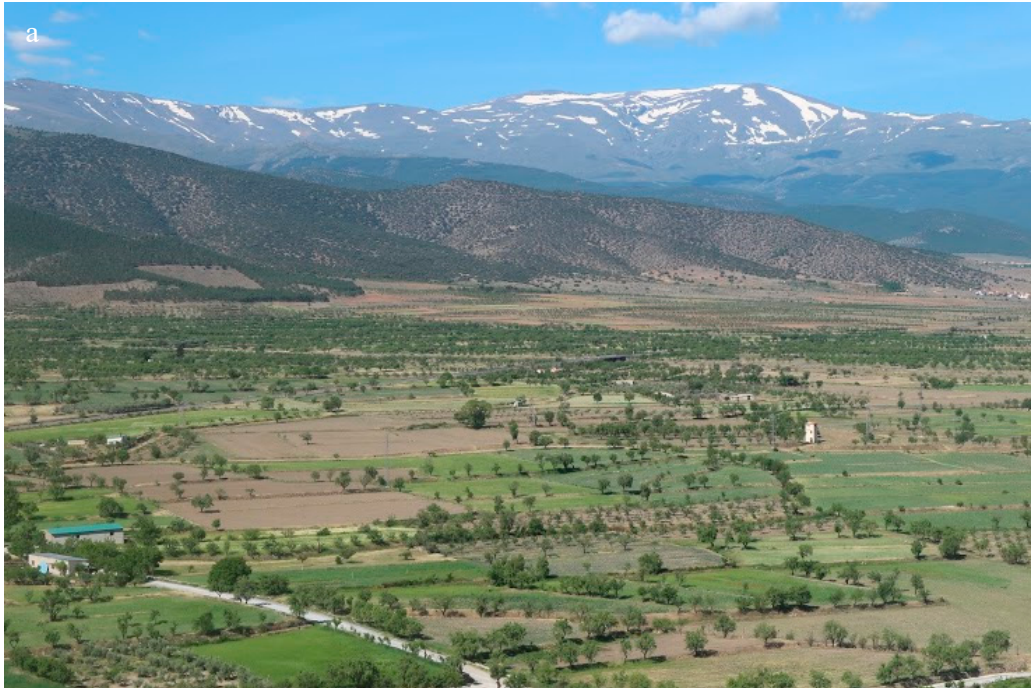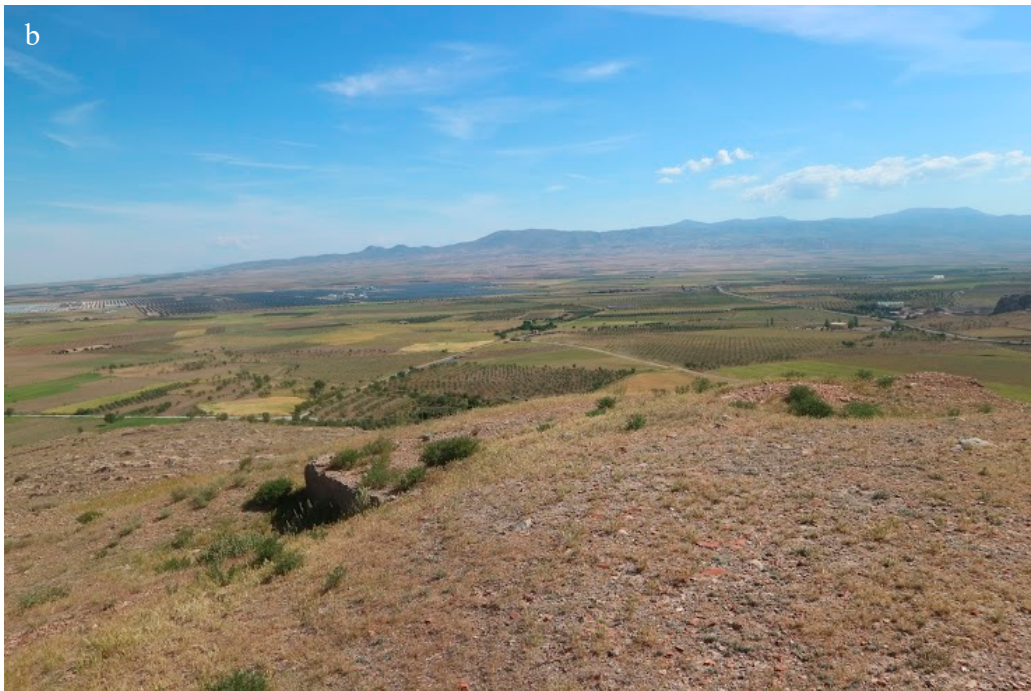

Not at all interesting    1    2    3    4    5    Extremely interesting

Please mention features of La Calahorra castle viewpoint that are very interesting to you in terms of scenic beauty (if any). \_\_\_\_\_

Geosite 28. Esfiliana: © G. Tessema, May 2019.

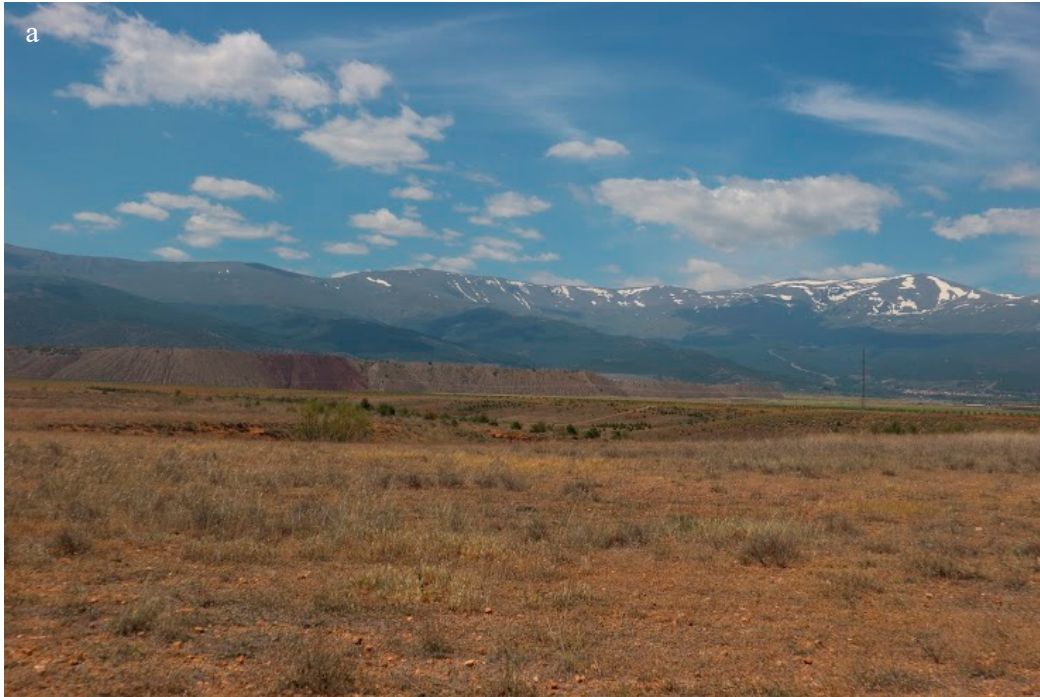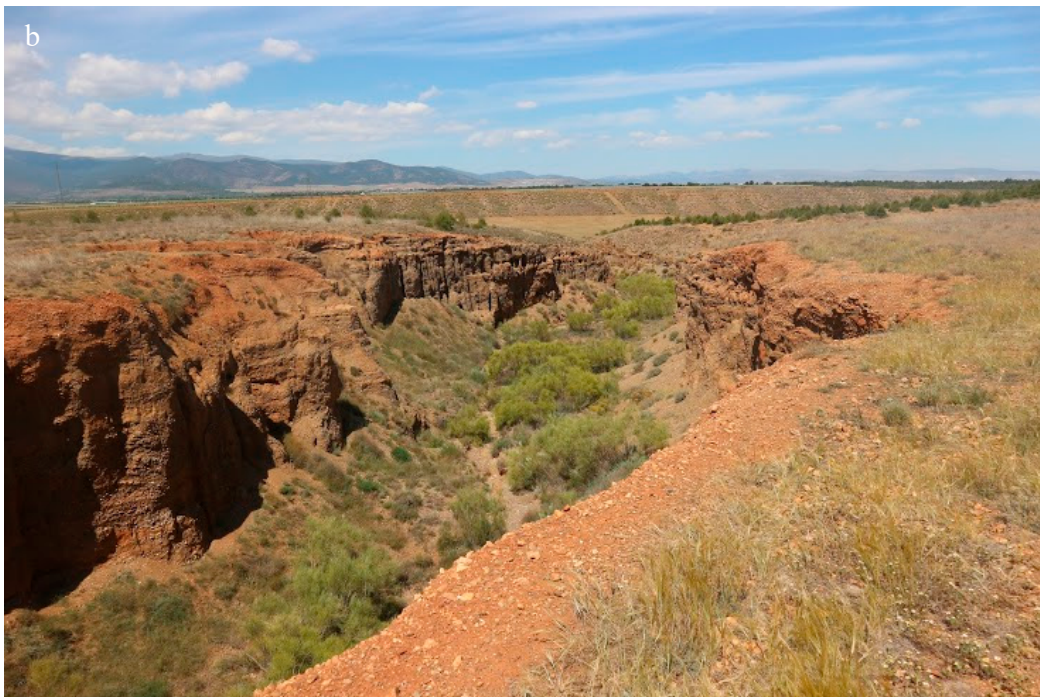

Not at all interesting    1    2    3    4    5    Extremely interesting

Please mention features of Esfiliana that are very interesting to you in terms of scenic beauty (if any).

---

Geosite 29. Gorafe: **a** © G. Tessema, May 2019. **b** © J. Poesen, May 2019.

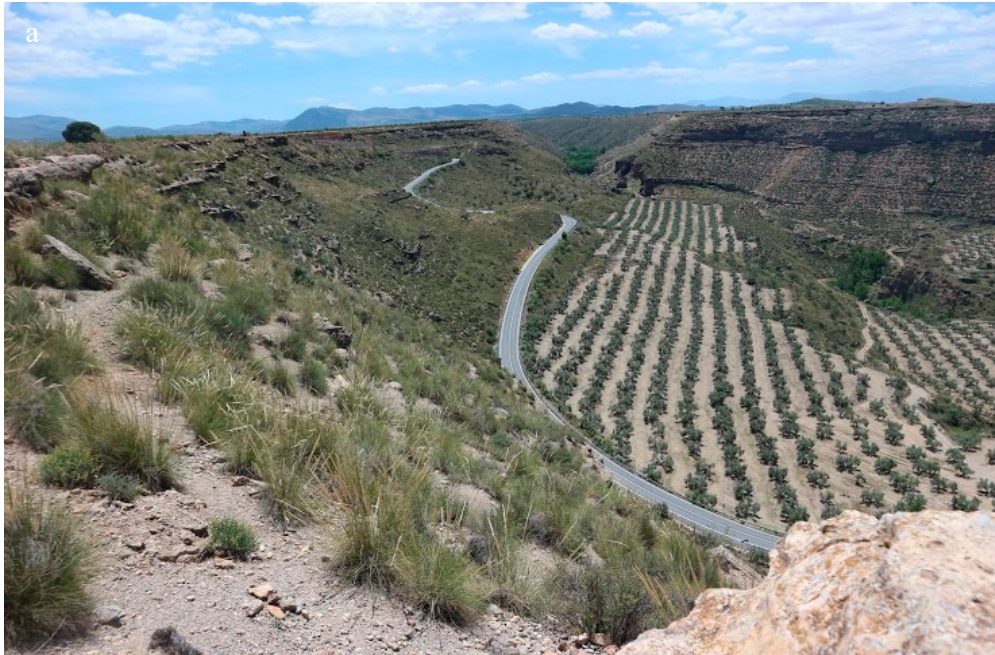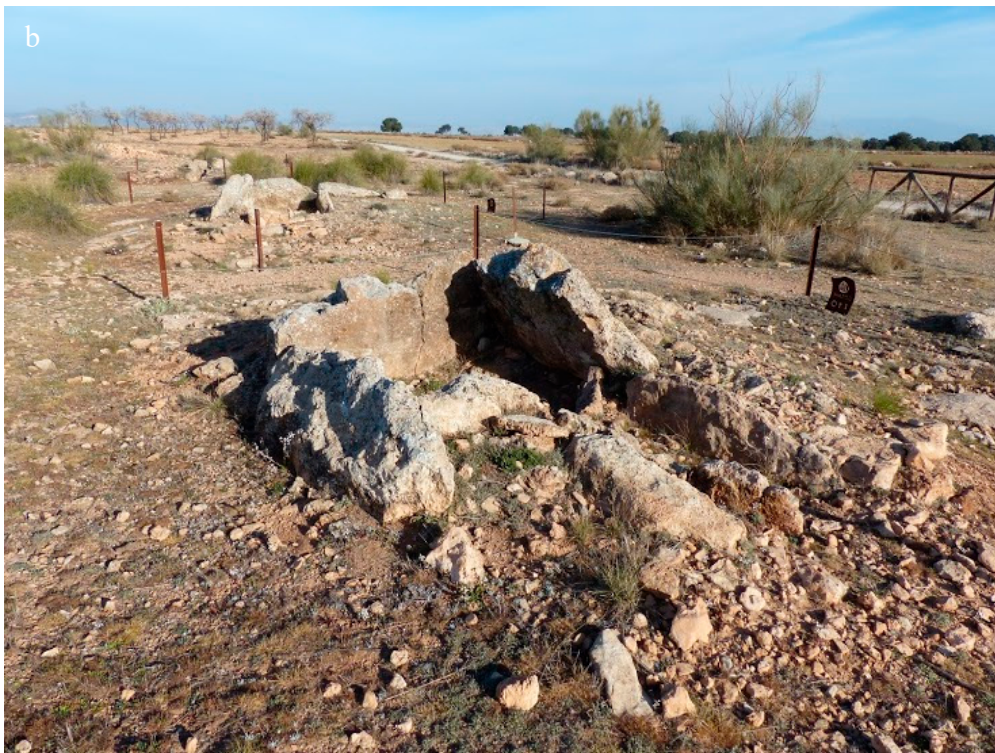

Not at all interesting      1      2      3      4      5      Extremely interesting

Please mention features of Gorafe that are very interesting to you in terms of scenic beauty (if any).

---

Geosite 30. Alicun de las Torres: **a,c** © G. Tessema, May 2019; **b** © J. Poesen, May 2019.

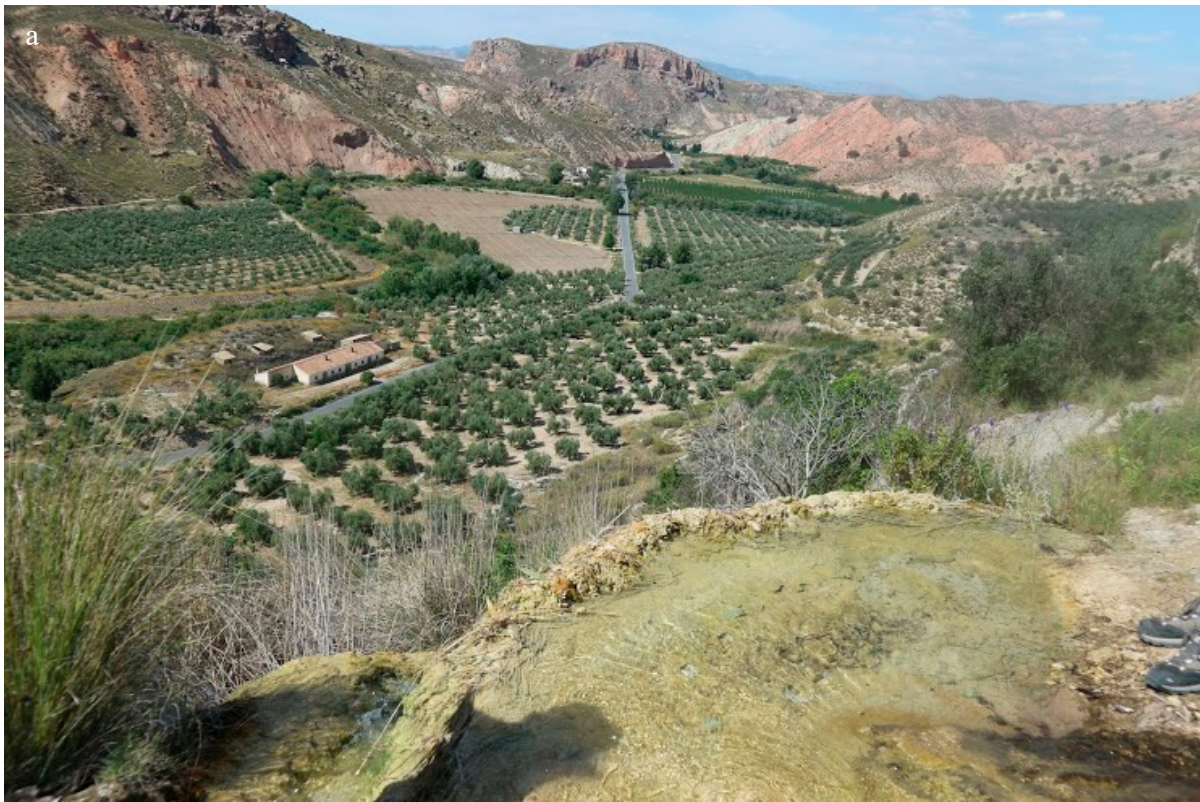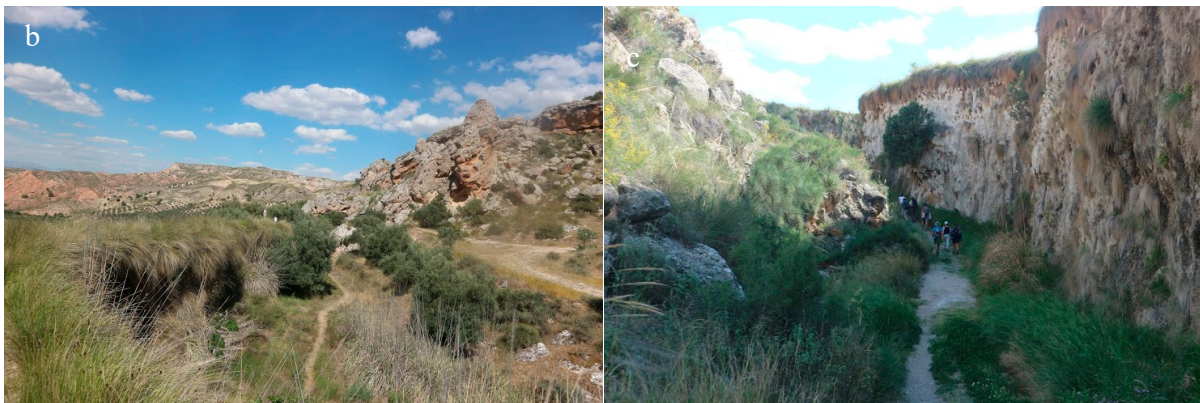

Not at all interesting    1    2    3    4    5    Extremely interesting

Please mention features of Alicun de las Torres that are very interesting to you in terms of scenic beauty (if any). \_\_\_\_\_

Geosite 31. Belerda: © G. Tessema, May 2019.

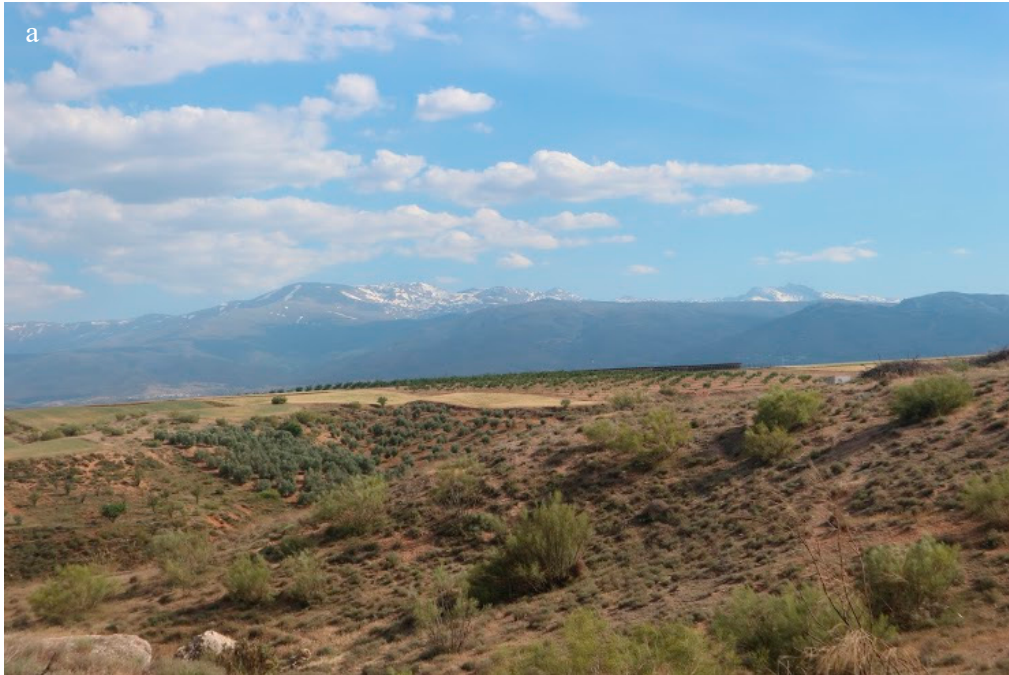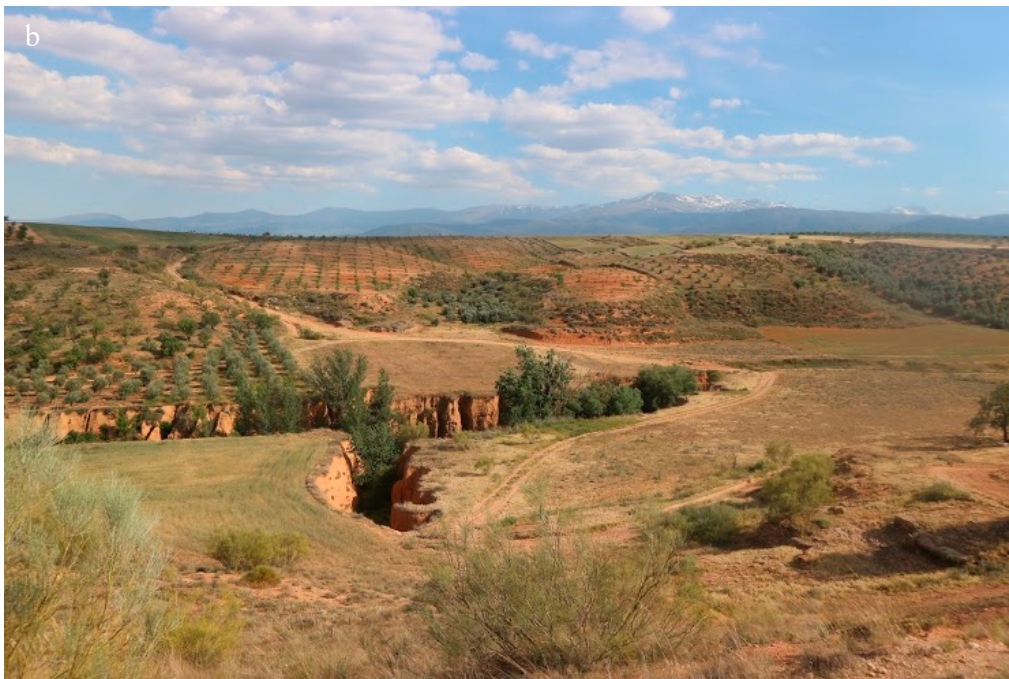

Not at all interesting      1      2      3      4      5      Extremely interesting

Please mention features of Belerda that are very interesting to you in terms of scenic beauty (if any).

---

Geosite 32. Rio Aguas: © G. Tessema, May 2019.

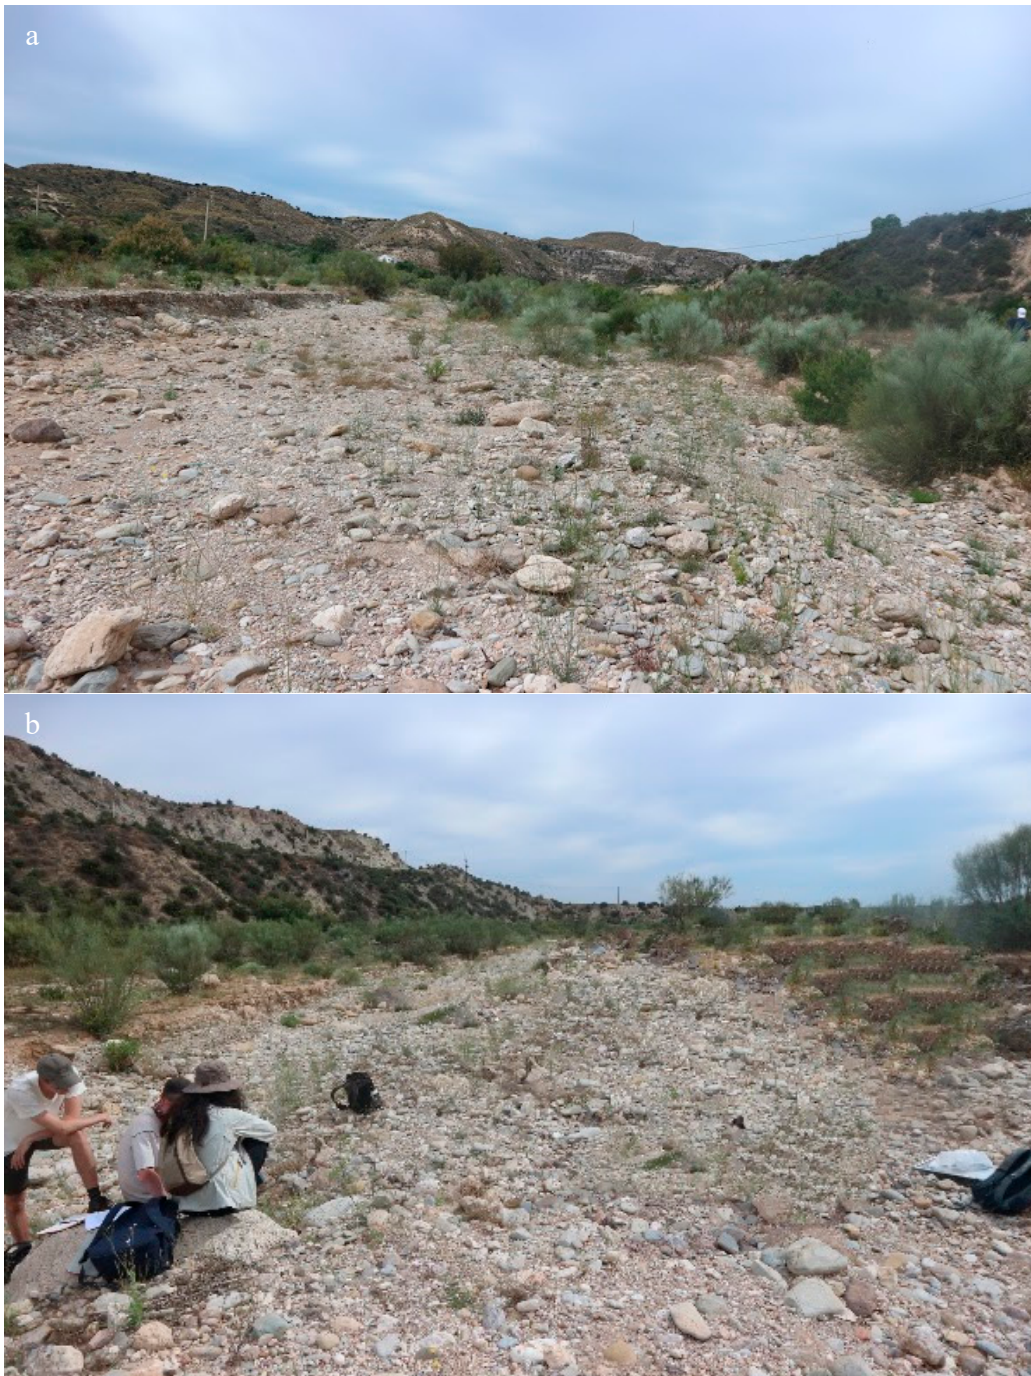

Not at all interesting    1    2    3    4    5    Extremely interesting

Please mention features of Rio Aguas that are very interesting to you in terms of scenic beauty (if any).

---

Geosite 33. Embalse de Isabel II: © J. Poesen, May 2019.

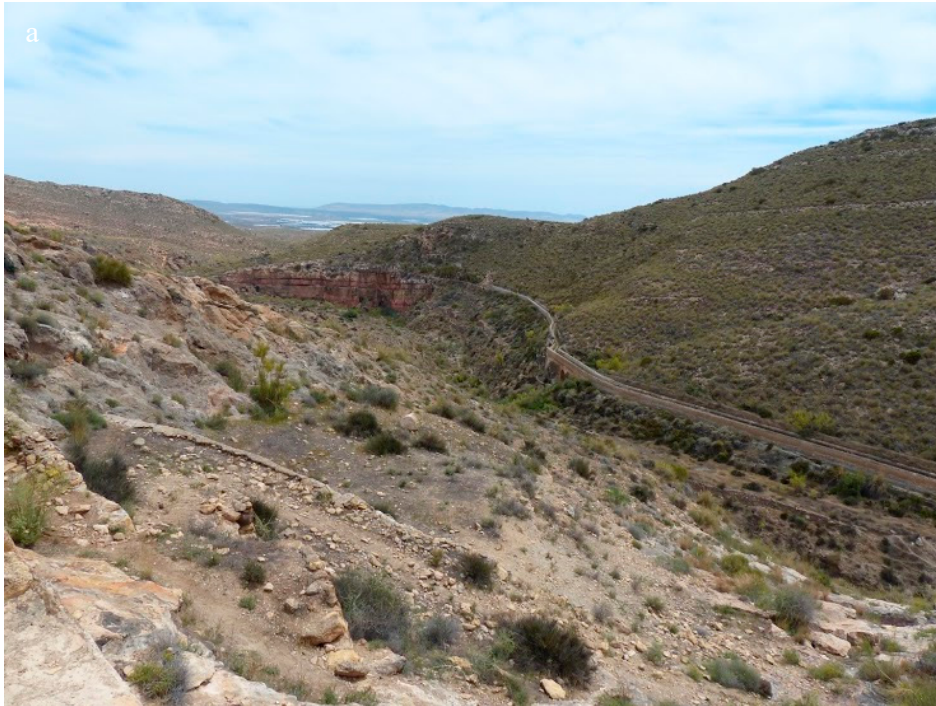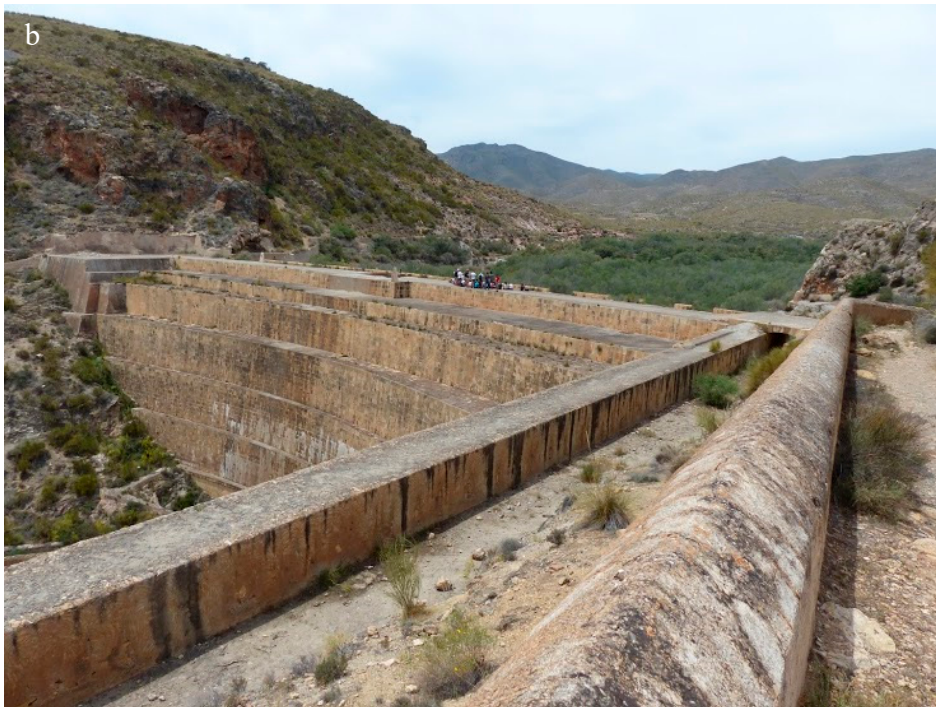

Not at all interesting      1      2      3      4      5      Extremely interesting

Please mention features of Embalse de Isabel II that are very interesting to you in terms of scenic beauty (if any). \_\_\_\_\_

Geosite 34. El Hoyazo: **a** © micROCKScopica<sup>5</sup>, April 2020; **b** A. Strekeisen<sup>6</sup>, 2020.

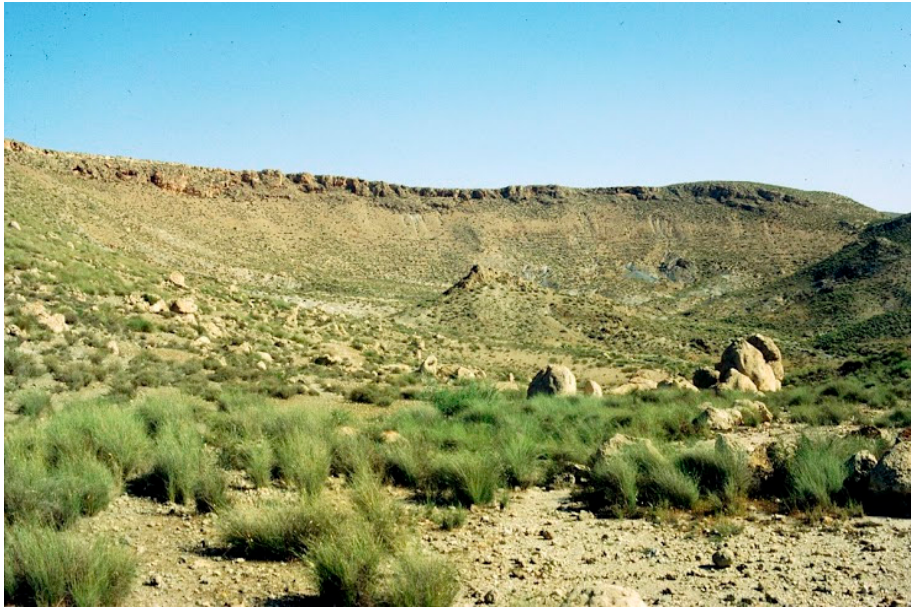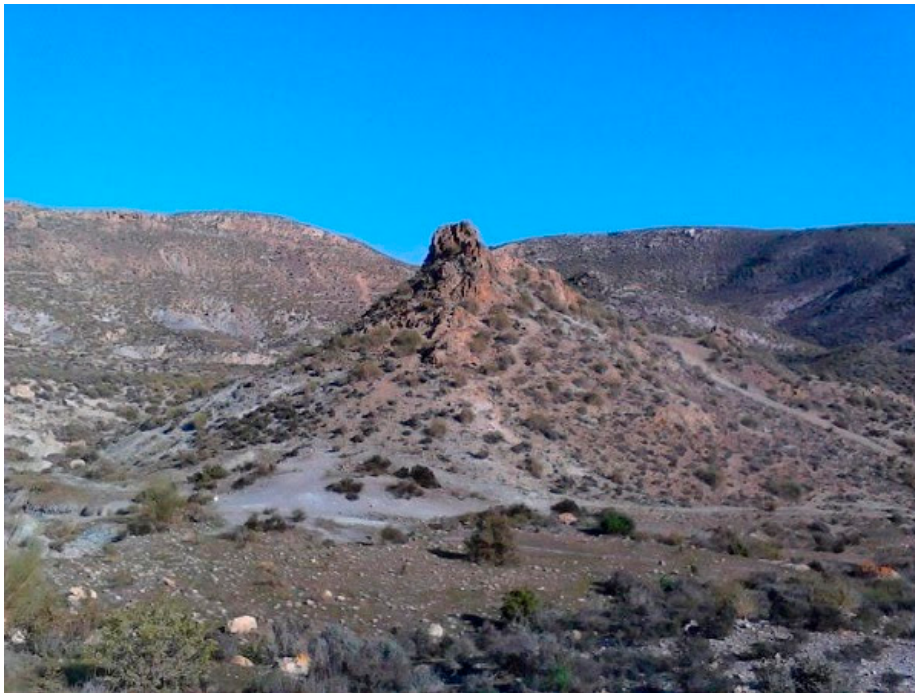

Not at all interesting    1    2    3    4    5    Extremely interesting

Please mention features of El Hoyazo that are very interesting to you in terms of scenic beauty (if any).

---

<sup>5</sup> <https://twitter.com/micROCKScopica/status/1246772709973004289/photo/1>

<sup>6</sup> <http://www.alexstrekeisen.it/english/vulc/hoyazo.php>

### Some background information about yourself

Please tell us some background information about yourself.

1. Gender

☐ Female ☐ Male

2. Age- please write your age\_\_\_\_\_

3. Education level

☐ Below bachelor ☐ Bachelor ☐ Master ☐ PhD ☐ Other, please specify \_\_\_\_\_

4. What is your educational background (e.g. economics, management, agriculture, tourism, water engineering, civil engineering, biology, geography, geology, anthropology, sociology, etc.)? Please mention it \_\_\_\_\_

5. Is your educational background related to earth science (such as geography, geology, soil science, etc.)?

☐ Yes ☐ No

6. Have you ever taken any of the following courses? Please mark all those you took.

☐ Physical geography ☐ Geomorphology ☐ Geology ☐ Volcanology ☐ Petrology  
☐ Mineralogy ☐ Tectonics ☐ Sedimentology ☐ No, I did not take any of these courses

7. Which types of tourist attractions are your primary preferences from these three categories of attractions: (a) geology and landscape, (b) biodiversity, (c) culture and history. If you are equally interested to two or all of the three types of attractions, please mark your answers accordingly.

☐ Geology and landscape ☐ Biodiversity ☐ Culture and History

8. In which country do you permanently live? \_\_\_\_\_

9. Which continents have you visited so far (excluding the continent you permanently live in)? Please mark all those you visited.

☐ Africa ☐ Asia ☐ Europe ☐ North America ☐ South America  
☐ Australia/Newzealand ☐ I have not traveled outside my continent

10. Have you been to southeastern Spain and visited the geosites shown in the photos of this questionnaire?

☐ Yes, I have been there and visited all of those geosites.  
☐ Yes, I have been there and visited many of those geosites.  
☐ Yes, I have been there and visited some of those geosites.  
☐ Yes, I have been there but did not visit those geosites.  
☐ No, I have not been there and did not visit those geosites.

**Questionnaire S2.** Questionnaire for rating the scenic beauty of the 34 geosites by the GB-V group<sup>7</sup>, based on field visit.

For the questions in the table below:

- A. please rate scenic beauty of geosites using a five point Likert scale. The scale ranges from (1) not at all interesting, (2) slightly interesting, (3) moderately interesting, (4) very interesting, to (5) extremely interesting. Please put (X) mark.
- B. please also state the features/elements of the geosite that are very interesting to you, if any.

| Geosite number | Name/s of the village and the geosite | Rating scale for scenic beauty |   |   |   |   | Features of the geosite that are very interesting |
|----------------|---------------------------------------|--------------------------------|---|---|---|---|---------------------------------------------------|
|                |                                       | 1                              | 2 | 3 | 4 | 5 |                                                   |
| 1              | Boca Andarax                          |                                |   |   |   |   |                                                   |
| 2              | Torre Garcia                          |                                |   |   |   |   |                                                   |
| 3              | Las Salinas                           |                                |   |   |   |   |                                                   |
| 4              | Punta Baja                            |                                |   |   |   |   |                                                   |
| 5              | Cerro Pistolas                        |                                |   |   |   |   |                                                   |
| 6              | Albaricoques                          |                                |   |   |   |   |                                                   |
| 7              | San Diego Mine                        |                                |   |   |   |   |                                                   |
| 8              | Rodalquilar Mine                      |                                |   |   |   |   |                                                   |
| 9              | La Isleta del Moro                    |                                |   |   |   |   |                                                   |
| 10             | Los Escullos                          |                                |   |   |   |   |                                                   |
| 11             | El Puntal                             |                                |   |   |   |   |                                                   |
| 12             | Rambla Nogalte                        |                                |   |   |   |   |                                                   |
| 13             | Lorca Castle                          |                                |   |   |   |   |                                                   |
| 14             | Puentes Dam                           |                                |   |   |   |   |                                                   |
| 15             | Zarcilla de Ramos (Rambla Salada)     |                                |   |   |   |   |                                                   |
| 16             | Sierra de la Torrecilla               |                                |   |   |   |   |                                                   |
| 17             | Rio Alias                             |                                |   |   |   |   |                                                   |
| 18             | Rambla de los Feos                    |                                |   |   |   |   |                                                   |
| 19             | Los Perales                           |                                |   |   |   |   |                                                   |
| 20             | Los Molinos                           |                                |   |   |   |   |                                                   |
| 21             | Lucainena de las Torres               |                                |   |   |   |   |                                                   |
| 22             | Los Yesos                             |                                |   |   |   |   |                                                   |
| 23             | Los Millares                          |                                |   |   |   |   |                                                   |
| 24             | Bar Alfaro                            |                                |   |   |   |   |                                                   |
| 25             | Mini Hollywood                        |                                |   |   |   |   |                                                   |

<sup>7</sup> The respondents in this study were grouped into three, following their geoscience background and field visits as follows: NGB-NV = no geoscience background and no visit to geosites; GB-NV = geoscience background and no visit to geosites; GB-V = geoscience background and visit to geosites.

|    |                      |  |  |  |  |  |  |
|----|----------------------|--|--|--|--|--|--|
| 26 | Rambla Honda         |  |  |  |  |  |  |
| 27 | La Calahorra         |  |  |  |  |  |  |
| 28 | Esfiliana            |  |  |  |  |  |  |
| 29 | Gorafe               |  |  |  |  |  |  |
| 30 | Alicun de las Torres |  |  |  |  |  |  |
| 31 | Belerda              |  |  |  |  |  |  |
| 32 | Rio Aguas            |  |  |  |  |  |  |
| 33 | Embalse de Isabel II |  |  |  |  |  |  |
| 34 | El Hoyazo            |  |  |  |  |  |  |

**Questionnaire S3.** Questionnaire for rating the scientific value of the 34 geosites by the GB-V group<sup>8</sup>, based on field visit.

For the questions in the table below:

- A. please rate the scientific value of geosites based on five point Likert scale. The scale ranges from (1) not at all interesting, (2) slightly interesting, (3) moderately interesting, (4) very interesting, to (5) extremely interesting. Please put (X) mark.
- B. please also state the features of the geosites that are very interesting to you, if any.

| Geosite number | Name/s of the village and the geosite | Rating scale for scientific value |   |   |   |   | Features of the geosite that are very interesting |
|----------------|---------------------------------------|-----------------------------------|---|---|---|---|---------------------------------------------------|
|                |                                       | 1                                 | 2 | 3 | 4 | 5 |                                                   |
| 1              | Boca Andarax                          |                                   |   |   |   |   |                                                   |
| 2              | Torre Garcia                          |                                   |   |   |   |   |                                                   |
| 3              | Las Salinas                           |                                   |   |   |   |   |                                                   |
| 4              | Punta Baja                            |                                   |   |   |   |   |                                                   |
| 5              | Cerro Pistolas                        |                                   |   |   |   |   |                                                   |
| 6              | Albaricoques                          |                                   |   |   |   |   |                                                   |
| 7              | San Diego Mine                        |                                   |   |   |   |   |                                                   |
| 8              | Rodalquilar Mine                      |                                   |   |   |   |   |                                                   |
| 9              | La Isleta del Moro                    |                                   |   |   |   |   |                                                   |
| 10             | Los Escullos                          |                                   |   |   |   |   |                                                   |
| 11             | El Puntal                             |                                   |   |   |   |   |                                                   |
| 12             | Rambla Nogalte                        |                                   |   |   |   |   |                                                   |
| 13             | Lorca Castle                          |                                   |   |   |   |   |                                                   |
| 14             | Puentes Dam                           |                                   |   |   |   |   |                                                   |
| 15             | Zarcilla de Ramos (Rambla Salada)     |                                   |   |   |   |   |                                                   |

<sup>8</sup> The respondents in this study were grouped into three, following their geoscience background and field visits as follows: NGB-NV = no geoscience background and no visit to geosites; GB-NV = geoscience background and no visit to geosites; GB-V = geoscience background and visit to geosites.

|    |                         |  |  |  |  |  |  |
|----|-------------------------|--|--|--|--|--|--|
| 16 | Sierra de la Torrecilla |  |  |  |  |  |  |
| 17 | Rio Alias               |  |  |  |  |  |  |
| 18 | Rambla de los Feos      |  |  |  |  |  |  |
| 19 | Los Perales             |  |  |  |  |  |  |
| 20 | Los Molinos             |  |  |  |  |  |  |
| 21 | Lucainena de las Torres |  |  |  |  |  |  |
| 22 | Los Yesos               |  |  |  |  |  |  |
| 23 | Los Millares            |  |  |  |  |  |  |
| 24 | Bar Alfaro              |  |  |  |  |  |  |
| 25 | Mini Hollywood          |  |  |  |  |  |  |
| 26 | Rambla Honda            |  |  |  |  |  |  |
| 27 | La Calahorra            |  |  |  |  |  |  |
| 28 | Esfiliana               |  |  |  |  |  |  |
| 29 | Gorafe                  |  |  |  |  |  |  |
| 30 | Alicun de las Torres    |  |  |  |  |  |  |
| 31 | Belerda                 |  |  |  |  |  |  |
| 32 | Rio Aguas               |  |  |  |  |  |  |
| 33 | Embalse de Isabel II    |  |  |  |  |  |  |
| 34 | El Hoyazo               |  |  |  |  |  |  |

**Background information about the persons of the GB-V group (this information is the same for Questionnaires S2 and S3).**

Please mark your answers with 'X' or write short answer as necessary.

1. Gender: please mark with 'X'.

☐ Female

☐ Male

2. Age- please write your age \_\_\_\_\_

3. Education level: please mark with 'X'.

☐ Below bachelor

☐ Bachelor

☐ Master

☐ PhD

☐ Other, please specify \_\_\_\_\_

4. In which country do you permanently live? \_\_\_\_\_

5. Which continents have you visited so far (excluding the continent you permanently live in)? Please mark all those you visited with 'X'.

☐ Africa

☐ Asia

☐ Europe

☐ North America

☐ South America

☐ Australia/Newzealand

☐ I have not traveled outside my continent

6. Which types of tourist attractions are your primary preferences from these three categories of attractions: (a) geology and landscape, (b) biodiversity, (c) culture and history. If you are equally interested to two or all of the three types of attractions, please mark your answers accordingly.

☐ Geology and landscape

☐ Biodiversity

☐ Culture and History
